1 **A co-expression network in hexaploid wheat reveals mostly balanced expression and**  
2 **lack of significant gene loss of homeologous meiotic genes upon polyploidization.**

3

4 Abdul Kader Alabdullah<sup>1\*</sup>, Philippa Borrill<sup>2</sup>, Azahara C. Martin<sup>1</sup>, Ricardo H. Ramirez-Gonzalez<sup>1</sup>, Keywan Hassani-Pak<sup>3</sup>  
5 Cristobal Uauy<sup>1</sup>, Peter Shaw<sup>1</sup> and Graham Moore<sup>1</sup>.

6

7 <sup>1</sup> John Innes Centre, Norwich Research Park, Norwich NR4 7UH, United Kingdom

8 <sup>2</sup> School of Biosciences, University of Birmingham, Birmingham B15 2TT, United Kingdom

9 <sup>3</sup> Rothamsted Research, Harpenden AL5 2JQ, United Kingdom

10

11 \* [AbdulKader.Alabdullah@jic.ac.uk](mailto:AbdulKader.Alabdullah@jic.ac.uk)

12

13

14 **Abstract**

15 Polyploidization has played an important role in plant evolution. However, upon polyploidization the  
16 process of meiosis must adapt to ensure the proper segregation of increased numbers of chromosomes  
17 to produce balanced gametes. It has been suggested that meiotic gene (MG) duplicates return to a  
18 single copy following whole genome duplication to stabilise the polyploid genome. Therefore, upon  
19 the polyploidization of wheat, a hexaploid species with three related (homeologous) genomes, the  
20 stabilization process may have involved rapid changes in content and expression of MGs on  
21 homeologous chromosomes (homeologs). To examine this hypothesis, sets of candidate MGs were  
22 identified in wheat using co-expression network analysis and orthology informed approaches. In total,  
23 130 RNA-Seq samples from a range of tissues including wheat meiotic anthers were used to define  
24 co-expressed modules of genes. Three modules were significantly correlated with meiotic tissue  
25 samples but not with other tissue types. These modules were enriched for GO terms related to cell  
26 cycle, DNA replication and chromatin modification, and contained orthologs of known MGs. Overall  
27 74.4 % of genes within these meiosis-related modules had three homeologous copies which was  
28 similar to other tissue-related modules. Amongst wheat MGs identified by orthology, rather than co-  
29 expression, the majority (93.7 %) were either retained in hexaploid wheat at the same number of

30 copies (78.4 %) or increased in copy number (15.3%) compared to ancestral wheat species.  
31 Furthermore, genes within meiosis-related modules showed more balanced expression levels between  
32 homeologs than genes in non-meiosis-related modules. Taken together our results do not support  
33 extensive gene loss nor changes in homeolog expression of MGs upon wheat polyploidization. The  
34 construction of the MG co-expression network allowed identification of hub genes and provided key  
35 targets for future studies.

36

### 37 **Author summary**

38 All flowering plants have undergone a polyploidization event(s) during their evolutionary history. One  
39 of the biggest challenges faced by a newly-formed polyploid is meiosis, an essential event for sexual  
40 reproduction and fertility. This process must adapt to discriminate between multiple related  
41 chromosomes and to ensure their proper segregation to produce fertile gametes. The meiotic  
42 mechanisms responsible for the stabilisation of the extant polyploids remain poorly understood except  
43 in wheat, where there is now a better understanding of these processes. It has been proposed that  
44 meiotic adaptation in established polyploids could involve meiotic gene loss following the event of  
45 polyploidization. To test this hypothesis in hexaploid wheat, we have computationally predicted sets  
46 of hexaploid wheat meiotic genes based on expression data from different tissue types, including  
47 meiotic anther tissue, and orthology informed approaches. We have calculated homeolog expression  
48 patterns and number of gene copies for the predicted meiotic genes and compared them with proper  
49 control gene sets. Our findings did not support any significant meiotic gene loss upon wheat  
50 polyploidization. Furthermore, wheat meiotic genes showed more balanced expression levels between  
51 homeologs than non-meiotic genes.

52

### 53 **Introduction**

54 Meiosis is a specialized mode of cell division which generates haploid gametes. Prior to meiosis,  
55 chromosomes are replicated. On entry into meiosis, homologous chromosomes (homologs) locate  
56 each other, and intimately align (synapse) along their length. Within this paired structure,

57 chromosomes recombine and crossover before being accurately segregated [1-3]. This complex and  
58 dynamic process is essential to maintain genome stability and integrity over sexual life cycles and to  
59 generate genome variation, which is a major evolutionary driving force [4,5]. The genetic variation  
60 created by meiotic recombination underpins plant breeding to improve crop species [6-8].

61 Polyploidization has played an important role in the evolution and speciation of flowering plants  
62 [9,10], although the resultant multiplicity of related genomes poses a major challenge for the meiotic  
63 process. Segregation of the chromosomes to produce balanced gametes requires correct pairing,  
64 synapsis and recombination between only true homologs, rather than any of the other highly related  
65 chromosomes (homeologs) [10-12].

66

67 In the last two decades, there have been significant advances in our understanding of plant meiosis.  
68 Since the isolation of the first meiosis-specific cDNA from lily in the mid-1990s [13,14], more than  
69 110 plant meiotic genes (MGs) have been identified, mainly from studies of the model diploid plants  
70 Arabidopsis and rice [2,15,16]. Although 25-30% of flowering plants are extant polyploids [9], the  
71 meiotic mechanisms responsible for their stabilisation remain poorly understood. An exception is  
72 hexaploid wheat (*Triticum aestivum* L.), where there is now better understanding of these processes  
73 [17]. Despite possessing multiple related genomes, durum wheat, a tetraploid (AABB) and bread  
74 wheat, a hexaploid (AABBDD) behave as diploids during meiosis. Thus, most of the meiotic studies  
75 conducted in hexaploid wheat have focused on providing better understanding of the meiotic  
76 processes required to stabilise this polyploid species [18-22]. An emphasis has been to characterise  
77 the role of the *Ph1* locus in the suppression of recombination between homeologs [23-31]. Recent  
78 studies have defined this phenotype to a *ZIP4* gene which duplicated and diverged on polyploidization  
79 [31-33]. This event resulted in the suppression of homeologous crossover, and promotion of  
80 homologous synapsis.

81 Although all flowering plants have undergone at least one event of whole genome duplication during  
82 their evolutionary history [34], it has been suggested that MG duplicates return to a single copy  
83 following whole genome duplication, more rapidly than the genome-wide average [35]. Therefore, it  
84 has been assumed that the stabilisation process upon the polyploidization of wheat also involved rapid

85 changes in the content and expression of the genes on homeologs. This process would facilitate the  
86 correct pairing and synapsis of homeologs during meiosis. The recent development of an expression  
87 atlas for hexaploid wheat revealed that 70% of homeologous genes in syntenic triads showed balanced  
88 expression [36]; however, this study did not include analysis of the genes expressed during meiosis.  
89  
90 Here, we assessed whether the level of expression of all genes in triads was balanced between  
91 homeologs during meiosis. Analysis indicated similar balanced expression to that observed in other  
92 wheat tissues. However, it could be argued that only meiotic specific genes might show differential  
93 expression between homeologs. Sets of candidate MGs were identified using co-expression network  
94 analysis and orthology informed approaches, allowing us to evaluate the effect of polyploidization on  
95 wheat MG copy number and expression. The combination of co-expression network analysis, in  
96 conjunction with orthologue information, will now contribute to the discovery of new MGs and  
97 greatly empower reverse genetics approaches to validate the function of candidate genes in wheat.

98

## 99 **Results and Discussion**

100 An initial assessment of the homeolog expression pattern in triads during meiosis in hexaploid wheat  
101 was undertaken. Relative expression abundance of 19,801 triads (59,403 genes) was calculated for 8  
102 tissues, including meiotic anther tissue, according to published criteria [36]. This analysis revealed  
103 that the percentage of balanced triads was slightly higher in meiotic anther tissue (77.3%) than in  
104 other type of tissues (ranging from 67.3% in floral organs and 76.6% in leaves) (S1 Fig). The copy  
105 number of genes expressed during meiosis was also investigated. This involved the definition of  
106 19801 triads (59403 genes), 7565 duplets (15130 genes), 15109 monads (single-copy genes) and  
107 18250 genes from the “Others” group with various copy numbers, based on the *EnsemblPlants*  
108 database for the HC genes of hexaploid wheat [37] (IWGSC v1.1 gene annotation; S1 Table).  
109 Comparison of copy number of genes expressed in the 8 different tissues showed that 70.9% of the  
110 genes expressed during meiosis belonged to triads. This percentage ranged between 66.5% and 72.5%  
111 for the genes expressed in floral organs and stem tissues, respectively (S2 Fig). These results were

112 consistent with a previous study reporting significant balanced expression between homeologous  
113 genes in tissues other than meiotic anthers [36]. However, the observations were not in agreement  
114 with the hypothesis that stabilisation of polyploidization involved significant changes in gene content  
115 and expression between homeologs [35,38,39]. Considering that not all genes expressed in meiotic  
116 anther tissue are directly involved in the meiosis process, it is possible that meiotic specific genes  
117 exhibit a different pattern. Therefore, a co-expression gene network was developed to compare the  
118 expression pattern of homeologous genes in meiosis-related modules, which potentially represent  
119 meiosis specific genes, and other tissue-related modules.

120

### 121 **Weighted co-expression network construction**

122 Network-based approaches have been proved useful in systems biology, to mine gene function from  
123 high-throughput gene expression data. Gene co-expression analysis has become a powerful tool to  
124 build transcriptional networks of genes involved in common biological events in plants [40-45]. The  
125 use of co-expression networks has uncovered candidate genes to regulate biological processes in  
126 many plants including wheat [37], rice [46,47] and *Arabidopsis thaliana* [48,49]. The recently  
127 published high-quality genome reference sequence [37] and a developmental gene expression atlas  
128 [50,36], together with the gene expression data collected from meiotic samples, were used to build a  
129 co-expression gene network. One hundred and thirty samples from different tissue types were  
130 included in this co-expression analysis (S2 Table; Fig 1A). A set of 60,379 genes out of the total  
131 107,892 HC genes was considered expressed during meiosis (transcript per million (TPM) > 0.5 in at  
132 least one meiosis sample) and used to run the co-expression analysis. Using the “WGCNA” package  
133 in R [51,52], genes with similar expression patterns were grouped into modules via the average  
134 linkage hierarchical clustering of normalized count expression values (Fig 1E). The power of  $\beta = 7$   
135 (scale free topology  $R^2 = 0.91$ ) was selected as the soft threshold power to emphasize strong  
136 correlations between genes and penalize weak correlations to ensure a scale-free network (Fig 1B-C).  
137 Based on this analysis, 50,387 out of 60,379 genes (83.5% of expressed genes) could be assigned to  
138 66 modules. Module size ranged from 52 to 7541 genes (mean 763 genes; median 429 genes) (Fig  
139 1D). Detailed information about gene number and gene IDs in each module is shown in S3 Table.

140 The expression patterns of all genes within a single module were summarized into a Module  
141 Eigengene (ME; representative gene of the module) to minimize data size for subsequent analyses.  
142 Expression patterns of modules are shown as a heatmap by plotting ME values in relation to tissue  
143 samples (**Fig 2**).

144

145 **Fig 1. The weighted gene co-expression networks analysis (WGCNA).** (A) Clustering dendrogram  
146 of 130 samples from different types of tissues. The sample clustering was based on the expression  
147 data of the genes expressed in at least one meiosis sample. (B) Determination of soft-thresholding  
148 power ( $\beta$ ). The soft power threshold used in constructing the weighted gene co-expression networks  
149 was chosen as the first power to exceed a scale-free topology fit index of 0.9 (then  $\beta = 7$ ). (C)  
150 Analysis of the mean connectivity for various soft-thresholding powers. (D) Number of genes in the  
151 modules with their frequency. (E) Blockwise dendrogram of the analysed genes (60,379 genes)  
152 clustered based on a dissimilarity measure of topological overlap matrices (TOM).

153

154 **Fig 2. Heatmap plotting of MEs values in relationship to tissue samples.**  $n$  indicates number of  
155 samples.

156

### 157 **Identification of meiosis-related modules**

158 A correlation analysis was conducted using the 66 MEs and the 8 different tissue types. A module was  
159 considered as meiosis-related when there was a strong correlation ( $r$ ) with the 17 meiosis samples,  
160 and a weak or negative correlation with other tissue types. Accordingly, three meiosis-related modules  
161 were identified: module 2 (containing 4,940 genes); module 28 (544 genes); and module 41 (313  
162 genes). Module 41 showed the strongest correlation with meiotic tissue ( $r = 0.73$ ,  $\text{FDR} = 2.7 \times 10^{-20}$ ),  
163 compared to module 2 ( $r = 0.61$ ,  $\text{FDR} = 9.2 \times 10^{-13}$ ) and module 28 ( $r = 0.52$ ,  $\text{FDR} = 2.1 \times 10^{-8}$ ). (**Fig**  
164 **3**).

165

166 **Fig 3. Co-expression network modules in relationship to tissues samples.** Each row corresponds to  
167 a module; each column corresponds to a tissue type; Each cell contains the correlation value and, in  
168 parentheses, its corresponding FDR adjusted  $P$  value.  $n$  indicates number of samples. Only modules  
169 that have correlation value  $> 0.5$  with meiotic anther tissue are shown.

170

171 Two other modules (modules 11 and 25) also showed significantly positive correlation with meiotic  
172 samples ( $r = 0.68$  and  $0.65$ , respectively), however they were not considered meiosis-related because  
173 they also correlated with samples from floral organs (at stages other than meiosis) and spike tissues,  
174 as shown in **Fig 3**. Therefore, our analysis focused on the three modules (2, 28 and 41), exhibiting a  
175 strong correlation with meiotic tissues and not with other floral organs, while modules 11 and 25 were  
176 considered as non-meiosis specific modules (referred to in this paper as non-meiotic modules). Other  
177 tissue-related modules (the top three correlated modules) were also identified to be used as controls  
178 for the meiosis-related modules in the subsequent analysis. These modules were: grain-related  
179 modules 5, 13 and 32 ( $r = 0.89$ ,  $0.89$  and  $0.85$ , respectively); leaves-related modules 1, 45 and 60 ( $r =$   
180  $0.72$ ,  $0.68$  and  $0.71$ , respectively); and roots-related modules 7, 9 and 64 ( $r = 0.70$ ,  $0.76$  and  $0.85$ ,  
181 respectively) (**S3 Fig**).

182

### 183 **Biological significance of expression similarity in modules**

184 Several approaches were undertaken to validate the meiosis-related modules. The three modules (2,  
185 28 and 41), strongly correlated with meiotic tissue expression, were found to be significantly enriched  
186 with the gene ontology (GO) slim terms “cell cycle”, “DNA metabolic process”, “nucleobase-  
187 containing compound metabolic process” and “nucleus” (**Fig 4**). Among the top five enriched GO  
188 slim terms in each of the 66 modules, the term “cell cycle” was significant only in the three meiosis-  
189 related modules, suggesting this was not a general property of all modules, and was instead specific to  
190 the meiosis modules. Module 2 in particular was significantly enriched with GO terms related to  
191 many biological processes occurring during meiosis such as “DNA replication”, “histone  
192 methylation”, “cytokinesis”, “nucleosome assembly” and “chromatin silencing” (**Table 1; S4 Table**).  
193 The term “double-strand break repair via homologous recombination”, an important process during

194 meiosis, was the primary enriched Biological Processes GO term in module 41 (FDR < 0.05). The  
 195 biological processes mediated by genes in module 28 included “protein deneddylation”, “positive  
 196 regulation of G2/M transition of mitotic cell cycle”, “COP9 signalosome” and other terms related to  
 197 protein deneddylation and cell cycle control (**Table 1**). GO terms of meiosis-related modules were  
 198 compared with those of modules highly correlated with other tissues. The GO terms “chloroplast”,  
 199 “plastids”, “thylakoid”, “photosystem” were significantly enriched in module 1, the most highly  
 200 correlated module with leaves. The terms related to protein ubiquitination and protein binding were  
 201 enriched in module 5 (the most highly correlated module with grain), while the terms “lignin  
 202 biosynthetic process”, “phenylpropanoid metabolic process” and “response to wounding” were  
 203 enriched in module 7, the largest module correlated with roots (**S4 Fig**). This indicated that our co-  
 204 expression module-tissue correlation was meaningful both from the biological and physiological point  
 205 of view. Detailed information of the enriched GO and GO slim terms in all modules is listed in the  
 206 supplementary table **S4 Table**. In summary, GO analysis confirmed that the three modules (2, 28 and  
 207 41) were enriched for genes associated with meiotic processes.

208

209 **Fig 4. Enriched GO slim terms in the meiosis-related modules.** Top 5 enriched GO terms in each  
 210 module are shown. BP indicates Biological Processes and CC Cellular Component. No Molecular  
 211 Function (MF) GO terms appear among the top 5 GO slim terms. Black bars indicate the number of  
 212 genes in the GO term.

213

214 **Table 1. Top 5 enriched GO terms in the meiosis-related modules for each ontology group.**

| GO term                       |                                                  |                                                                  |                                               |
|-------------------------------|--------------------------------------------------|------------------------------------------------------------------|-----------------------------------------------|
| (FDR adjusted <i>P</i> value) |                                                  |                                                                  |                                               |
|                               | Biological Process                               | Molecular Function                                               | Cellular Components                           |
| <b>Module 2</b>               | cell proliferation<br>( $2.2 \times 10^{-222}$ ) | protein heterodimerization activity<br>( $1.5 \times 10^{-93}$ ) | nucleosome<br>( $9.3 \times 10^{-162}$ )      |
|                               | DNA replication<br>( $4.8 \times 10^{-151}$ )    | DNA binding<br>( $1.8 \times 10^{-69}$ )                         | nuclear chromatin<br>( $2 \times 10^{-100}$ ) |
|                               |                                                  |                                                                  |                                               |



|           |                                                                                              |                                                                                     |                                                                                |
|-----------|----------------------------------------------------------------------------------------------|-------------------------------------------------------------------------------------|--------------------------------------------------------------------------------|
|           | histone H3-K9 methylation<br>( $1.6 \times 10^{-137}$ )                                      | microtubule binding<br>( $1.3 \times 10^{-41}$ )                                    | chromosome<br>( $3.5 \times 10^{-95}$ )                                        |
|           | DNA-dependent DNA replication<br>( $5.4 \times 10^{-135}$ )                                  | DNA-dependent ATPase activity<br>( $1.6 \times 10^{-32}$ )                          | pericentric heterochromatin<br>( $3.2 \times 10^{-88}$ )                       |
|           | regulation of DNA replication<br>( $2.4 \times 10^{-127}$ )                                  | motor activity<br>( $4.4 \times 10^{-31}$ )                                         | heterochromatin<br>( $6.7 \times 10^{-84}$ )                                   |
| Module 28 | protein denuddylation<br>( $3.6 \times 10^{-16}$ )                                           | apurinic or apyrimidinic site<br>endonuclease activity<br>( $3.3 \times 10^{-05}$ ) | COP9 signalosome<br>( $3.3 \times 10^{-21}$ )                                  |
|           | positive regulation of G2/M transition of<br>mitotic cell cycle<br>( $5.4 \times 10^{-11}$ ) | RNA cap binding<br>( $1.8 \times 10^{-03}$ )                                        | nucleus<br>( $6.8M \times 10^{-10}$ )                                          |
|           | COP9 signalosome assembly<br>( $1.2 \times 10^{-7}$ )                                        | NADH activity<br>( $3.2 \times 10^{-3}$ )                                           | nuclear cap binding complex<br>( $1.5 \times 10^{-6}$ )                        |
|           | mitotic recombination<br>( $1.5 \times 10^{-7}$ )                                            | enoyl-[acyl-carrier-protein] reductase<br>activity<br>( $3.2 \times 10^{-3}$ )      | protein-containing complex<br>( $1.9 \times 10^{-6}$ )                         |
|           | photomorphogenesis<br>( $1.7 \times 10^{-7}$ )                                               | signaling receptor activity<br>( $3.9 \times 10^{-3}$ )                             | cortical cytoskeleton<br>( $1.5 \times 10^{-3}$ )                              |
|           | double-strand break repair via homologous<br>recombination<br>( $3.9 \times 10^{-5}$ )       | methyl-CpG binding<br>( $1 \times 10^{-4}$ )                                        | nuclear euchromatin<br>( $7.3 \times 10^{-5}$ )                                |
|           | somatic cell DNA recombination<br>( $1.1 \times 10^{-4}$ )                                   | siRNA binding<br>( $1.6 \times 10^{-3}$ )                                           | nucleus<br>( $1 \times 10^{-4}$ )                                              |
| Module 41 | meiosporocyte differentiation<br>( $4.3 \times 10^{-4}$ )                                    | SUMO transferase activity<br>( $2.1 \times 10^{-3}$ )                               | RNA polymerase IV complex<br>( $1.1 \times 10^{-3}$ )                          |
|           | gene silencing by RNA<br>( $5.5 \times 10^{-4}$ )                                            | DNA binding<br>( $5.7 \times 10^{-3}$ )                                             | RNA polymerase II, core complex<br>( $4 \times 10^{-3}$ )                      |
|           | positive regulation of sulfur metabolic process<br>( $1.1 \times 10^{-3}$ )                  | cytosine C-5 DNA demethylase activity<br>( $1 \times 10^{-2}$ )                     | proteasome regulatory particle, base<br>subcomplex<br>( $4.4 \times 10^{-3}$ ) |

215

216

## 217 **Enrichment of meiosis-related modules for wheat orthologs of known MGs.**

218 An assessment was undertaken to confirm that the meiosis-related modules were enriched for wheat

219 orthologs of known MGs. Although the first wheat meiotic cDNA clones were isolated concurrently

220 with the early discoveries of MGs in other plants [53], the identification of MGs in wheat has been  
221 hampered by the large wheat genome size, its polyploid nature and the absence of a complete genome  
222 sequence. Thus, in comparison to model plants (Arabidopsis and rice), few MGs have been  
223 functionally characterized in wheat. Characterised wheat MGs include *TaASY1* [54,55], *TaMSH7*  
224 [56], *TaRAD51* [57,58], *TaDMC1* [57,58], *TaPSH1* [59], *TaZIP4* [31-33] and RecQ-7 [60]. Given  
225 that, the assessment of whether the three modules contain known MGs was undertaken using  
226 orthology informed approaches. A set of 1063 candidate MGs in wheat was identified and categorized  
227 based on the method used to identify the genes: the “Orthologs” group contained 407 genes (S5  
228 Table; S6 Table) that correspond to wheat orthologs of 103 functionally characterized MGs in model  
229 plant species, and the “Meiotic GO” group contained 927 wheat genes annotated with one or more  
230 meiotic GO terms (S7 Table). There were 271 genes overlapping between the two groups (Fig 5A),  
231 that were considered in the “Orthologs” group when undertaking gene enrichment analysis. The  
232 presence of each gene in the different modules was determined. A set of 848 genes was assigned to  
233 modules in the co-expression network (Fig 5B), including 340 genes in meiosis-related modules.  
234 Genes from both groups were significantly over-represented ( $P < 0.05$ ) in four modules, including  
235 two meiosis-related modules (2 and 28). Module 2 in particular, was the most enriched for these  
236 genes, possessing more than one third of the total candidate MGs assigned to modules. Module 2 had  
237 142 wheat orthologs of MGs and 155 genes with meiotic GO terms, compared to the expected number  
238 (based on module size) of 27 and 42, respectively. Module 41 (the third meiosis-related module) was  
239 enriched only with genes from the “Orthologs” group, having 15 orthologs of known MGs, whereas  
240 the expected number was 2 (Fig 5C). Consistent with this, genes from the “Orthologs” and/or  
241 “Meiotic GO” groups, were significantly under-represented in modules strongly correlated with other  
242 types of tissue (modules 1, 7 and 9), and in modules with negative or no correlation with meiotic  
243 tissue (modules 3, 8, 14, and 17) (S8 Table).

244

245 **Fig 5. Enrichment of meiosis-related genes in the co-expression network modules.** (A) Venn  
246 diagram of overall genes in the meiosis-related modules (modules 2, 28 and 41), wheat orthologs of  
247 MGs in model plant species and genes with meiotic GO terms. *n* indicates number of genes in each

248 group. Numbers in brackets refer to number of genes not included in the WGCNA analysis because  
249 they are not expressed in meiotic anther tissue. **(B)** Total number of genes assigned to modules from  
250 orthologs of MGs and genes with meiotic GO terms. **(C)** Gene enrichment in modules. Statistical  
251 significance of gene enrichment in a module is colour coded (Red indicates over-represented, blue  
252 under-represented and grey not significant;  $P < 0.05$ ). Rhombus shape indicates the expected number  
253 of genes in module.

254

255 In this study three co-expression gene modules were identified that are strongly correlated to meiotic  
256 anther tissue and highly enriched with GO terms related to many processes occurring during meiosis,  
257 orthologs of known MGs and genes having meiosis-specific GO terms. Although 67 (65%), out of the  
258 103 wheat orthologs, had at least one gene copy assigned to one of the three meiosis-related genes,  
259 there were 36 orthologs whose gene homeologs were assigned to other modules (**S9 Table**). Some of  
260 those genes have essential meiotic functions, like: *ASY1*, which encodes a protein essential for  
261 homologous chromosome synapsis [**54,61,62**]; and *DMC1*, a gene encoding a recombination protein  
262 that acts only in meiosis [**58,63**]. Others are known to have both meiotic and mitotic functions, like:  
263 *BRCA2*, a DNA repair gene required for double strand breaks repair by homologous recombination  
264 [**64**] and *SMC1* and *SMC3*, chromosome cohesion genes [**65**], thus they are expressed in both  
265 reproductive and non-reproductive tissues. Assessment of these 36 orthologs showed that the  
266 expression patterns of their gene copies did not allow them to be clustered in any of the meiosis-  
267 related modules (or allocated to module 0 that is composed of genes not forming part of a co-  
268 expressed module), either because they were expressed in most samples from all types of tissues, or  
269 because they were expressed in a few samples of a specific tissue type (like meiotic anther tissue).  
270 The expression values (TPMs) of all gene copies of those 36 orthologs are summarized in **S10 Table**.  
271 The number of meiotic anther samples (17) used in the present study, might not be enough to identify  
272 all MGs being expressed in a specific meiotic stage. Such genes might be identified by WGCNA  
273 analysis when a larger number of meiotic samples becomes available. However, the analysis  
274 confirmed that the meiosis-related modules were indeed enriched for orthologs of known MGs, and  
275 for GO terms associated with processes involved in meiosis.

276

277

## 278 **Copy number of MGs**

279 It has previously been suggested that MG duplicates return to a single copy following whole genome  
280 duplication more rapidly than the genome-wide average in angiosperms [35]. The analysis of 19  
281 meiotic recombination genes in hexaploid wheat and oilseed rape showed no evidence of gene loss  
282 after polyploidization. However, a recent study in tetraploid oilseed rape showed that reducing the  
283 copy number of *MSH4*, a key meiotic recombination gene involved in the ZMM pathway, prevents  
284 meiotic crossovers between non-homologous chromosomes [66]. This led to the suggestion that  
285 meiotic adaptation in polyploids could involve ‘fine-tuning’ the progression or the effectiveness of  
286 meiotic recombination, which could be achieved through the loss of MG duplicates in the newly-  
287 formed polyploids [35,66]. This hypothesis was evaluated in hexaploid wheat. The gene copy number  
288 was assessed for the genes in the three meiosis-related modules and compared with genes in all  
289 modules and in other tissue-related modules. Analysis showed that the percentage of genes belonging  
290 to triads was 74.4% in the meiosis-related modules, which was similar to this percentage in other  
291 tissue-related modules (72.5%, 74.0% and 76.1% in leaves-, grain- and roots-related modules,  
292 respectively); however, it was significantly higher than those of the non-meiotic modules (57.4%).  
293 The highest percentage of genes with three homeologs (83.3%) and lowest percentage of genes with  
294 single copy (2.7%) were observed in the group of genes identified as MG orthologs and/or possessing  
295 a meiotic GO term (Fig 6A).

296

297 **Fig 6. Copy number and homeolog expression pattern for genes from meiosis-related and other**  
298 **tissue-related modules.** (A) Proportion of genes in each copy number category (triads, duplets,  
299 monads and others) for different sets of expressed genes during meiosis including: “Meiotic modules”  
300 refers to the three meiosis-related modules 2, 28 and 41; “Non-meiotic modules” refers to the modules  
301 11 and 25 that showed high correlation with meiotic anther but were not considered meiosis-related  
302 because they were also correlated with spike and floral organs tissues; the top 3 correlated modules  
303 with each of leaves (modules 1, 45 and 60), grain (modules 5, 13 and 32) and roots (modules 7, 9 and

304 64) tissues; “All modules” contains all genes assigned to modules in the co-expression network and  
305 “Orthologs & Meiotic GO” refers to the set of genes that are orthologs of known MGs in other plant  
306 species and/or have meiotic GO terms. *n* number of genes in each set. (B) Proportion of genes from  
307 each homeolog expression pattern category (balanced, dominant and suppressed) calculated for triads  
308 in the previously mentioned sets of genes. *n* number of genes in each set. (C) Ternary plot showing  
309 relative expression abundance in meiotic anther tissue of 2,366 triads to which the genes of meiosis-  
310 related modules (2, 28 and 41) belong. Each circle represents a gene triad with an A, B, and D  
311 coordinate consisting of the relative contribution of each homeolog to the overall triad expression.  
312 Triads in vertices correspond to single-subgenome-dominant categories, whereas triads close to edges  
313 and between vertices correspond to suppressed categories. Box plots indicate the relative contribution  
314 of each subgenome based on triad assignment to the seven categories (Balanced, A dominant, B  
315 dominant, D dominant, A suppressed, B suppressed, D suppressed). Percentages between brackets  
316 indicate the percentage of triad number in each category to the total number of triads.

317

318 The high percentage of meiosis-related genes present as triads provides evidence that polyploid wheat  
319 did not experience significant gene loss (gene erosion) after polyploidization. However, this assumes  
320 that these genes were originally present as single copy genes in each of the A-, B- and D-genome  
321 progenitor species which gave rise to polyploid wheat. Therefore, the copy number of the 103 wheat  
322 MG orthologs in wheat progenitor species was investigated. All possible orthologs (high and low  
323 confidence predicted orthologs) were retrieved from *Ensembl* Plants Genes 43 database for *Triticum*  
324 *urartu* (ASM34745v1; [67]), the diploid progenitor of the wheat A-genome, the D-genome ancestor  
325 *Aegilops tauschii* (Aet\_v4.0; [68]), the diploid progenitor of the wheat D-genome and *Triticum*  
326 *dicoccoides* (WEWSeq\_v.1.0; [69]), the tetraploid progenitor of the hexaploid wheat (genome  
327 AABB). There was no change in copy number of 78.4% of genes, while 6.3% and 15.3% of genes had  
328 a lower and greater number of copies, respectively (**Table 2** and **S11 Table**). Regardless of genome of  
329 origin, the percentage of MGs with more copies was always greater than the percentage of genes with  
330 fewer copies. Comparing the A-genome MGs copy number in hexaploid wheat with the relevant

331 orthologs copy number in the corresponding A-genome ancestor, 86 genes (84.5%) had the same gene  
 332 copy number in *T. dicoccoides* as in hexaploid wheat, while only 64 genes (63.1%) had the same gene  
 333 copy number in *T. urartu*. This is consistent with the evolutionary history of hexaploid wheat, with *T.*  
 334 *dicoccoides* being a more recent wheat progenitor (~10,000 years) than *T. urartu* (> 5 million years)  
 335 [70].

336

337 **Table 2. Changes in copy number of wheat MGs in comparison with their orthologs in wheat**  
 338 **progenitors.** Comparison was done for two sets of genes: wheat orthologs of MGs ( $n = 103$ ) and  
 339 wheat meiotic recombination genes ( $n = 64$ ).

|                                            | Number of meiotic genes (%) |                        |                      | Number of meiotic recombination genes (%) |                        |                      |
|--------------------------------------------|-----------------------------|------------------------|----------------------|-------------------------------------------|------------------------|----------------------|
|                                            | Lower copy<br>number        | Greater copy<br>number | Equal copy<br>number | Lower copy<br>number                      | greater copy<br>number | Equal copy<br>number |
| <b>A genome</b><br><i>(T. urartu)</i>      | 9 (8.7%)                    | 29 (28.2%)             | 64 (63.1%)           | 3 (4.7%)                                  | 21 (32.8%)             | 40 (62.5%)           |
| <b>A genome</b><br><i>(T. dicoccoides)</i> | 5 (4.9%)                    | 11 (10.7%)             | 86 (84.5%)           | 3 (4.7%)                                  | 9 (14.1%)              | 52 (81.3%)           |
| <b>B genome</b><br><i>(T. dicoccoides)</i> | 6 (5.8%)                    | 12 (11.7%)             | 84 (82.5%)           | 3 (4.7%)                                  | 6 (9.4%)               | 55 (85.9%)           |
| <b>D genome</b><br><i>(Ae. tauschii)</i>   | 6 (5.8%)                    | 11 (10.7%)             | 85 (83.5%)           | 4 (6.3%)                                  | 5 (7.8%)               | 55 (85.9%)           |
| <b>Average per all<br/>genomes</b>         | 7 (6.3%)                    | 16 (15.3%)             | 81 (78.4%)           | 3 (5.1%)                                  | 10 (16.0%)             | 51 (78.9%)           |

340

341

342 An analysis on a subset of wheat genes, which were expected to be involved in meiotic recombination  
 343 based on the function of their orthologs in model plants (64 genes; **S11 Table**), was conducted. Again,  
 344 results showed that the majority (94.9%) of those genes had greater or no change in number of copies  
 345 (**Table 2**). Given it has been suggested that the reduction in the copy number of ZMM pathway genes  
 346 could stabilize meiosis in Brassica [66], the copy number of the wheat orthologs of seven ZMM genes

347 was evaluated. Five of the seven ZMM genes (*MER3*, *MSH5*, *ZIP4*, *PTD* and *SHOC1*) had equal or  
348 greater number of copies. However, *TaMSH4* gained one A-genome copy (comparing with *T. urartu*)  
349 and lost one D-genome copy (compared with *Ae. tauschii*), while *TaHEI10* lost A-genome copy and  
350 gained a D-genome copy (**S11 Table**). In conclusion, our findings did not support any significant  
351 gene loss upon the polyploidization of hexaploid wheat, as suggested for other polyploids [**35,66,71**].

352

### 353 **Homeolog expression patterns in triads of MGs**

354 Initial analysis revealed that most genes expressed during meiosis showed balanced expression  
355 between homeologs (**S1 Fig**). The analysis was repeated using gene expression within the validated  
356 meiosis modules. Genes from all modules were assigned to three categories (balanced, dominant and  
357 suppressed) (see Materials and Methods; **S12 Table**). Homeolog expression patterns in triads showed  
358 that meiosis-related modules 2, 28 and 41 had the highest percentage (87.3%) of genes with balanced  
359 expression (belong to balanced triads), compared to the top three tissue-related modules for grain,  
360 leaves and roots (**Fig 6B**). Surprisingly, the group of candidate MGs selected for being orthologs of  
361 known MGs in other plant species and/or having meiotic GO terms had a higher percentage of genes  
362 from balanced triads (88.3%); whereas the modules not considered meiosis-specific (having high  
363 correlation with meiotic anther tissue and with spike and floral organs) contained only 68.3% genes  
364 with balanced expression (**Fig 6B**). The majority (84.19%) of triads with genes in meiosis-related  
365 modules (2,366 triads) showed balanced expression in meiotic anther tissue (**Fig 6C**).

366

367 In wheat, meiotic recombination and gene evolution rates are strongly affected by chromosome  
368 position, with relatively low recombination rates in the interstitial and proximal regions (genomic  
369 compartments R2a, C and R2b) but notably higher rates toward the distal ends of the chromosomes  
370 (genomic compartments R1 and R3) [**72,73**]. The lack of significant changes in gene content and  
371 more balanced expression between homeologs, suggested that these genes might be more prevalent in  
372 the proximal genomic compartments [**36,37**]. The distribution of MGs was therefore assessed across  
373 the genomic compartments compared with the distribution of all HC genes across chromosomes (**S13**  
374 **Table**). Analysis showed that genes from the meiotic modules (modules 2, 28 and 41), were

375 significantly over-represented in the genomic compartments R2a, C and R2b ( $P = 2.4 \times 10^{-5}$ ,  $3.1 \times 10^{-6}$   
 376 and  $1 \times 10^{-5}$ , respectively), while they were under-represented in the R1 and R3 genomic  
 377 compartments ( $P = 1.7 \times 10^{-8}$  and  $1.7 \times 10^{-10}$ , respectively) (**Fig 7A**). Enrichment in the R2a genomic  
 378 compartment region was not observed for genes from any of the other top three tissue-related modules  
 379 (**Fig 7B**), since 21.7% of genes from the meiosis-related modules were assigned to R2a, while this  
 380 percentage ranged between 18.2% and 19.5% in other tissue-related modules (**Table 3**). Interestingly,  
 381 the set of the genes identified through orthology approaches had also similar high percentage (21%) of  
 382 genes assigned to R2a genomic compartment (**Table 3**).

383

384 **Fig 7. Enrichment of genes from different tissue-related modules in the wheat genomic**  
 385 **compartments.** (A) Number of genes (actual and expected) from the three meiosis-related modules in  
 386 each genomic compartment. (B) Comparison of number of genes from different tissue-related  
 387 modules in genomic compartments. Statistical significance of gene enrichment in modules is colour  
 388 coded (Red indicates enriched, blue depleted and grey not significant;  $P < 0.05$ ). Black dots indicate  
 389 the expected number of genes in groups.

390

391 **Table 3. Number of genes from different groups in the wheat genomic compartments.**

| Modules                           | R1   |       | R2a  |       | C    |       | R2b   |       | R3    |       |
|-----------------------------------|------|-------|------|-------|------|-------|-------|-------|-------|-------|
|                                   | No.  | %     | No.  | %     | No.  | %     | No.   | %     | No.   | %     |
| <b>Meiotic modules</b>            | 625  | 10.9% | 1246 | 21.7% | 531  | 9.3%  | 1823  | 31.8% | 1515  | 26.4% |
| <b>Non-meiotic modules</b>        | 158  | 10.5% | 292  | 19.5% | 123  | 8.2%  | 469   | 31.3% | 456   | 30.4% |
| <b>Grain modules</b>              | 338  | 10.2% | 649  | 19.5% | 287  | 8.6%  | 1144  | 34.4% | 903   | 27.2% |
| <b>Leaves modules</b>             | 838  | 10.8% | 1466 | 18.9% | 853  | 11.0% | 2557  | 33.0% | 2037  | 26.3% |
| <b>Roots modules</b>              | 270  | 10.3% | 479  | 18.2% | 177  | 6.7%  | 951   | 36.1% | 754   | 28.7% |
| <b>All modules</b>                | 5147 | 10.3% | 9880 | 19.9% | 4507 | 9.1%  | 16491 | 33.1% | 13738 | 27.6% |
| <b>Orthologs &amp; Meiotic GO</b> | 78   | 6.5%  | 253  | 21.0% | 164  | 13.6% | 387   | 32.1% | 324   | 26.9% |

392

393 Our analysis reveals that homeologous MGs on homeologs mostly show balanced expression and lack  
 394 a significant change in MG content following polyploidization. The majority of homeologous genes  
 395 (not only MGs) on homeologs also show over 95% sequence identity to each other [37,74]. Given



396 these observations, such homeologs could synapse and recombine during meiosis. However, in  
397 allohexaploid wheat, homologs rather than homeologs synapse and recombine during meiosis  
398 ensuring the stability and fertility of this species, and the *Ph1* locus, in particular the *TaZIP4* gene  
399 copy inside this locus, has been identified as the main locus controlling this process. The wheat *ZIP4*,  
400 an ortholog of *ZIP4/Spo22* in *A. thaliana* and rice, is a member of the ZMM genes involved in the  
401 synaptonemal complex formation and class I crossovers pathway [75,76]. Moreover, wheat lacking  
402 *Ph1* exhibits extensive genome rearrangements, including translocation, duplications, and deletions  
403 [33]. Thus, the evolution of *Ph1* during wheat polyploidization may explain why wheat has largely  
404 maintained a similar gene content and balanced expression of its homeologs. How meiosis has  
405 adapted to cope with allopolyploidy in other species is still to be resolved; however, it has been  
406 suggested that reduction in the copy number of meiotic genes may stabilize the meiotic process after  
407 polyploidization [35,66]. The present study shows that this is not the case in wheat. It is possible that  
408 the presence of *Ph1* in wheat enabled the retention of multiple copies of meiotic genes as an  
409 alternative mechanism to ensure proper segregation of chromosomes during meiosis. In any case, the  
410 identification of the *TaZIP4* gene within the *Ph1* locus as the gene responsible for the *Ph1* effect on  
411 recombination and the observed effects of *Ph1* in wheat suggests that it may have more of a central  
412 role in meiosis than originally suspected from studies on model systems [75,76]. It has recently been  
413 suggested that *ZIP4* might act as a scaffold protein facilitating physical interactions and assembly of  
414 different proteins complexes [75,76,77]. Therefore, our co-expression network was used to identify  
415 the wheat orthologs of known MGs connected with *TaZIP4*. The analysis indicates that the three  
416 *TaZIP4* homeologs on group 3 (TraesCS3A02G401700, TraesCS3B02G434600 and  
417 TraesCS3D02G396500) were clustered in module 2, the largest meiosis-related module, and strongly  
418 connected to many orthologs of MGs with various meiotic functions (Fig 8). However, the *TaZIP4*  
419 copy responsible for *Ph1* phenotype (TraesCS5B02G255100) did not cluster in the same module,  
420 reflecting its different expression profile from the other homeologs, being expressed in most tissues  
421 [31-33]. *TaZIP4* was connected to wheat orthologs of genes known to be involved in crossover  
422 formation such as *MSH2*, *SHOC1*, *FANCM*, *FLIP*, *EME1B*, *MUS81* [2]. This suggests that there may  
423 be an interplay between *TaZIP4* and genes from the anti-crossover pathway. The *TaZIP4* sub-network

424 supports a more central role of *ZIP4* in meiosis than originally suspected from studies on model  
425 species.

426

427 **Fig 8. The wheat MG orthologs connected to *TaZIP4*.** The alluvial diagram shows the connected  
428 genes to the *TaZIP4* homeologs *TaZIP4-A1*, *TaZIP4-B1* and *TaZIP4-D1*. Edge weight > 0.05 was  
429 used as threshold to visualise connected genes. Black bars indicate the number of homeologs for each  
430 connected gene.

431

## 432 **Further characterisation of the wheat meiotic co-expression network**

### 433 **1) Identification of hub genes in the meiosis-related modules**

434 Hub genes were identified within our meiosis-related modules by calculating the correlation between  
435 expression patterns of each gene and the module eigengene: the most highly correlated genes to the  
436 eigengene being the hub genes. The top 10 hub genes of each module with their functional annotation  
437 are shown in **Table 4**. The top 10 hub genes in module 2 were core histone genes, supporting the  
438 strong contribution of histones in this meiosis-related module. For further verification of histone  
439 involvement in module 2 and other modules in general, all wheat genes annotated as core histones or  
440 having GO terms related to histone modification, were retrieved for enrichment analysis. Analysis  
441 showed that the five types of histones (H1, H2A, H2B, H3 and H4) were enriched only in module 2  
442 ( $P = 3.6 \times 10^{-4}$ ,  $1.2 \times 10^{-22}$ ,  $1.1 \times 10^{-19}$ ,  $9.4 \times 10^{-21}$ , and  $3.3 \times 10^{-26}$ , respectively), having 433 genes  
443 (85% of all core histone genes in all modules), compared to an expected number of genes of 39 (**Fig**  
444 **9**). Similar results were obtained for histone modification genes. Module 2 was the most enriched  
445 module with this group of genes ( $P = 9.3 \times 10^{-52}$ ), containing 438 genes (30% of all histone  
446 modification genes in all modules). The histone modification genes were also enriched in 11 other  
447 modules, including the other meiosis-related modules (modules 28 and 41), however, with much  
448 lower numbers of enriched genes (**Fig 9**). Detailed information about genes included in this analysis is  
449 provided in **S14 Table**. The strong enrichment of histone modification genes in module 2 (the largest  
450 meiosis-related module) supports the important role of histone modifications in meiosis [**78-83**].

451

452

453 **Fig 9. Histone genes enrichment in the gene co-expression network modules.** The analysis

454 included all the genes annotated as core histones (H1, H2A, H2B, H3 and H4) in the wheat genome

455 and the genes with GO terms related to histone modification. Statistical significance of gene

456 enrichment in a module at  $P < 0.05$  is colour coded (Red indicates enriched, blue depleted and grey

457 not significant). Rhombus shape indicates the expected number of genes in module.

458

459 **Table 4.** The top 10 hub genes of each meiosis-related module with their functional annotation.

|           | Gene               | Functional annotation           | GO terms                                                                          |
|-----------|--------------------|---------------------------------|-----------------------------------------------------------------------------------|
| Module 2  | TraesCS1B02G192500 | Histone H2B                     | nucleosome; DNA binding; protein heterodimerization activity                      |
|           | TraesCS1D02G286600 | Histone H4                      | nucleosome; DNA binding; nucleosome assembly; protein heterodimerization activity |
|           | TraesCS3A02G534100 | Histone H2A                     | nucleosome; DNA binding; protein heterodimerization activity                      |
|           | TraesCS6A02G034300 | Histone H2A                     | nucleosome; DNA binding; protein heterodimerization activity                      |
|           | TraesCS6A02G034600 | Histone H2A                     | nucleosome; DNA binding; protein heterodimerization activity                      |
|           | TraesCS6B02G048300 | Histone H2A                     | nucleosome; DNA binding; protein heterodimerization activity                      |
|           | TraesCS6B02G049000 | Histone H2A                     | nucleosome; DNA binding; protein heterodimerization activity                      |
|           | TraesCS6D02G326800 | Histone H2B                     | nucleosome; DNA binding; protein heterodimerization activity                      |
|           | TraesCS7B02G408400 | Histone H2A                     | nucleosome; DNA binding; nucleus; protein heterodimerization activity             |
|           | TraesCSU02G095700  | Histone H3                      | nucleosome; DNA binding; protein heterodimerization activity                      |
| Module 28 | TraesCS1A02G263400 | Zinc finger CCCH domain protein | DNA binding; protein binding; zinc ion binding                                    |
|           | TraesCS2B02G281900 | Receptor kinase                 | protein kinase activity; protein binding; ATP binding; protein phosphorylation    |

|                  |                    |                                                      |                                                                                                       |
|------------------|--------------------|------------------------------------------------------|-------------------------------------------------------------------------------------------------------|
|                  | TraesCS2D02G000100 | Histone deacetylase complex subunit SAP30            | protein binding                                                                                       |
|                  | TraesCS2D02G263500 | Receptor kinase                                      | protein kinase activity; protein binding; ATP binding; protein phosphorylation                        |
|                  | TraesCS5B02G379400 | Vacuolar protein sorting-associated 2-2-like protein | vacuolar transport                                                                                    |
|                  | TraesCS5D02G070800 | Aminotransferase                                     | catalytic activity; biosynthetic process; pyridoxal phosphate binding                                 |
|                  | TraesCS5D02G386000 | Vacuolar protein sorting-associated 2-2-like protein | vacuolar transport                                                                                    |
|                  | TraesCS6A02G253900 | High mobility group protein                          | chromatin assembly or disassembly; chromatin binding; chromatin remodelling; DNA binding              |
|                  | TraesCS6B02G271600 | High mobility group protein                          | chromatin assembly or disassembly; chromatin binding; chromatin remodelling; DNA binding              |
|                  | TraesCSU02G072600  | Vacuolar protein sorting-associated 2-2-like protein | vacuolar transport                                                                                    |
|                  | <hr/>              |                                                      |                                                                                                       |
|                  | TraesCS1D02G003800 | Serine/threonine-protein kinase ATM                  | NA                                                                                                    |
|                  | TraesCS1D02G072800 | Chaperone protein dnaJ                               | cytoplasm ; protein folding; unfolded protein binding; heat shock protein binding; response to stress |
|                  | TraesCS2A02G120400 | adenine nucleotide transporter 1                     | NA                                                                                                    |
|                  | TraesCS2D02G401100 | High mobility group family                           | Nucleus; DNA binding; transcription factor activity; sequence-specific DNA binding                    |
| <b>Module 41</b> | TraesCS3A02G162200 | Zinc finger CCCH domain-containing protein 4         | metal ion binding                                                                                     |
|                  | TraesCS3D02G127500 | Ankyrin repeat protein-like                          | protein binding                                                                                       |
|                  | TraesCS4D02G284200 | F-box family protein                                 | protein binding                                                                                       |
|                  | TraesCS5A02G170400 | F-box protein                                        | protein binding                                                                                       |
|                  | TraesCS7A02G233900 | Poor homologous synapsis 1 protein                   | Nucleus; synapsis; intracellular signal transduction; kinase activity                                 |
|                  | TraesCS7D02G181800 | Interleukin-6                                        | NA                                                                                                    |
|                  | <hr/>              |                                                      |                                                                                                       |

460

461 Hub genes such as “*Poor homologous synapsis 1*” (*PHS1*) were also identified with module 41, the  
 462 module most highly correlated to meiotic samples. This gene has been previously reported to have a  
 463 key role in homologous chromosome pairing, synapsis, DNA recombination and accurate  
 464 chromosome segregation during meiosis in maize [84], Arabidopsis [85] and wheat [59]. Other hub

465 genes identified in modules 28 and 41 encoded for the high mobility group proteins [86-90], histone  
466 deacetylase [91-94], and F-box proteins [95].

467

## 468 2) Analysis of Transcription factors within the meiosis-related modules

469 Many transcription factors (TFs) have been reported as key regulators of meiosis from studies on  
470 animals [96,97], yeast [98-101] and protozoa [102]. However, very little is known about the  
471 involvement of TFs in plant meiosis. The meiotic co-expression network was therefore exploited to  
472 identify potential meiosis-specific TFs. An assessment was undertaken of the enrichment of  
473 previously identified TF families in hexaploid wheat in the meiosis-related modules 2, 28 and 41. A  
474 total of 4889 high confidence genes belonging to 58 TF families were predicted from the annotation  
475 of the wheat genome sequence. Of these, 2439 TFs from 57 families could be assigned to the 66  
476 modules in the gene co-expression network. Modules 2, 28 and 41 (meiosis-related modules) had 225,  
477 25 and 17 TFs belonging to 31, 13 and 9 TF families, respectively (S15 Table). Compared to the  
478 expected number of TF families genes in each module, only 5 TF families were significantly enriched  
479 in module 2: Mitochondrial transcription termination factor (mTERF); Growth-Regulating Factor  
480 (GRF); abscisic acid-insensitive protein 3/Viviparous1 (ABI3/VP1); Forkhead-associated domain  
481 (FHA) and E2F/ Dimerization Partner (DP). On the other hand, 4 TF families were significantly  
482 depleted (**Fig 10**). The TF family NAC was the only TF family significantly enriched in module 41,  
483 containing 5 NAC genes (expected number 0.6;  $P < 0.05$ ). Module 28 was not enriched with any TF  
484 family, although E2F/DP transcription factors were enriched in this module with borderline statistical  
485 significance ( $P = 0.06$ ), with 4 genes in this module (the expected number was 0.2). Except in module  
486 2, E2F/DP and FHA transcription factors families were not enriched in any other modules in the gene  
487 co-expression network (**S16 Table**). E2F/DP plays an important role in regulating gene expression  
488 necessary for passage through the cell cycle in mammals and plants [103-105]. Members of FHA  
489 contain the forkhead-associated domain, a phosphopeptide recognition domain found in many  
490 regulatory proteins. Genes belonging to the FHA group are reported to have roles in cell cycle  
491 regulation [106-108], DNA repair [109-112] and meiotic recombination and chromosome segregation  
492 [113-115]. A previous meiotic transcriptome study identified up-regulation of TFs belonging to the

493 MADS-box, bHLH, bZIP, and NAC families in Arabidopsis and maize meiocytes at early meiosis  
494 [116]. Zinc finger-like TFs have also been suggested to be regulators of maize MG expression [117].  
495 The present study indicates that TF families known to have roles in cell cycle and meiosis processes  
496 are over-represented in the meiosis-related modules (module 2 in particularly). Those TF families  
497 contain about 20 meiosis-specific candidate TF genes whose function can be validated using the  
498 available reverse genetics resources in polyploid wheat [118].

499

500 **Fig 10. Transcription factor families in the meiosis-related modules.** Statistical significance of  
501 gene enrichment in the modules is colour coded (Red indicates over-represented, blue under-  
502 represented and grey not significant;  $P < 0.05$ ). Rhombus shape indicates the expected number of  
503 genes in module.

504

### 505 3) Visualisation of networks and identification of candidate MGs

506 Having identified meiosis-related modules, the Networks within such modules can be visualised,  
507 highlighting genes for future studies. Edge files were created with gene annotation for the three  
508 meiosis-related modules 2, 28 and 41. Those files can be used to investigate the relation between  
509 orthologs of MGs within a module and ranked based on the strength of the connection (weight value).  
510 Another application of co-expression networks is the identification of previously uncharacterised  
511 genes regulating biological processes [37,40,42-49]. Cytoscape 3.7.1 software [119] was therefore  
512 used to visualise our network and to show connections between different orthologs of MGs in  
513 meiosis-related modules. Wheat MG orthologs in meiosis-related modules were used as “guide genes”  
514 to construct co-expression subnetworks containing only genes with direct connections to the guide  
515 genes. One such subnetwork is shown in Fig 11, where the following wheat orthologs of MGs in  
516 module 41 were selected and used to construct a meiotic subnetwork: *Poor Homologous Synapsis 1*  
517 (*TaPHS1*; [59]); *Argonaute* (*AGO9/AGO104*; [120,121]) *Replication protein A2c* (*OsRPA2c*; [122];  
518 *Meiotic nuclear division protein 1* (*AtMND1*; [123,124]); *MMS and UV Sensitive 81* (*AtMUS81*;  
519 [125,126]); and *Parting Dancers* (*AtPTD*; [127,128]) (guide genes; red circles in Fig 11). The

520 network complexity was reduced using an edge weight > 0.05. The visualized subnetwork contained  
521 53 gene IDs including 9 guide gene copies. The gene TraesCS7A02G233900 (*TaPHS1*), a hub gene in  
522 module 41, was central in the network having the highest number of direct edges (41 direct edges;  
523 connected with 77.4% of the genes in the subnetwork). This subnetwork allowed identification of  
524 other genes with putative roles in meiosis (pink circles): a) RNA recognition motifs-containing gene  
525 (TraesCS5A02G319000) similar to Mei2, a master regulator of meiosis and required for premeiotic  
526 DNA synthesis as well as entry into meiosis in *Schizosaccharomyces pombe* [129,130]; b) the gene  
527 TraesCS4D02G050000 showed similarity to Male meiocyte death 1 (*MMD/DUET*), a PHD-finger  
528 protein plays role in chromatin structure and male meiotic progression in *A. thaliana* [131,131]; c) the  
529 gene TraesCS5D02G454900, a possible TF belonging to the FHA family known to have function in  
530 cell cycle regulation [106-108], DNA repair [109-112] and meiotic recombination and chromosome  
531 segregation [113-115]. The meiotic subnetwork contained genes with similarity to cell cycle like F-  
532 box family proteins, high mobility family proteins, and chromatin remodelling genes. The subnetwork  
533 also contained a group of genes connected to most of our guide genes, which thus might be involved  
534 with them in similar biological processes. Examples of such genes are TraesCS3A02G101000,  
535 TraesCS1A02G292700 and TraesCS1D02G291100 which encode for zinc finger CCCH domain-  
536 containing proteins (Fig 11). Other meiotic subnetworks were also constructed using other guide  
537 genes from modules 2 and 28.

538

539 **Fig 11. A meiotic co-expression subnetwork in hexaploid wheat.** This subnetwork was constructed  
540 using 9 guide genes in module 41. Guide genes are wheat orthologs of MGs in other plant species (red  
541 circles); pink circles represent genes with putative meiosis function. Edge weight 0.05 was used as  
542 threshold to visualise genes in the subnetwork using Cytoscape 3.7.1 software.

543

#### 544 **4) The meiotic co-expression network is accessible in a larger biological context**

545 Our WGCNA co-expression network and GO enrichment data has been integrated with the wheat  
546 knowledge network [132] to make it publicly accessible in a larger biological context and to make it  
547 searchable through the KnetMiner web application (<http://knetminer.rothamsted.ac.uk>; [133]).

548 KnetMiner can be searched with keywords (incl. module ID and GO terms) and wheat gene  
549 identifiers. The gene knowledge graphs generated contain many additional relation types such protein-  
550 protein interactions, homology and links to genome wide association studies and associated literature  
551 placing the co-expression networks generated here in a wider context.

552

## 553 **Conclusion**

554 In summary, the present study shows that most MGs in wheat are retained as three homeologous  
555 genes, which are expressed during meiosis at similar levels, suggesting that they have not undergone  
556 extensive gene loss nor sub/neo-functionalisation. Meiosis-related modules have been used to create  
557 networks and identify hub genes providing targets for future studies. The network containing the *ZIP4*  
558 gene, recently defined as *Ph1* [31-33] for example, highlights potential interacting partners. Finally,  
559 the networks highlight genes such as *ZIP4* and “*Poor homologous synapsis 1*”, which may play a  
560 more central role in meiosis than previously thought. The co-expression network analysis combined  
561 with orthologue information will contribute to the discovery of new MGs and greatly empowers  
562 reverse genetics approaches to validate the function of candidate genes [118]. Ultimately this will lead  
563 to better understanding of the regulation of meiosis in wheat (and other polyploid plants) and  
564 subsequently improve wheat fertility.

565

566

## 567 **Materials and Methods**

568

### 569 **RNA-Seq data collection**

570 For co-expression network analysis we included 130 samples, containing 113 samples previously  
571 described in Ramírez-González et al. [36] and 17 samples from anthers during meiosis (9 samples  
572 from Martin *et al.* [33]), and 8 samples downloaded from  
573 (<https://urgi.versailles.inra.fr/files/RNASeqWheat/Meiosis/>). Samples were selected to represent all  
574 main tissue types: grain ( $n = 37$  samples), leaves ( $n = 21$  samples), roots ( $n = 20$  samples), anther at



575 meiosis ( $n = 17$  samples), spike ( $n = 12$  samples), floral organs (anther, pistil and microspores) at  
576 stages other than meiosis ( $n = 10$  samples), stem ( $n = 7$  samples) and shoots ( $n = 6$  samples). All  
577 samples were under nonstress conditions and mostly from the reference accession Chinese Spring.  
578 Detailed information about the used samples are listed in the supplementary materials (**S2 Table**).

579

#### 580 **Mapping of RNA-Seq reads to reference**

581 Kallisto v0.42.3 [134] was used to map all RNA-Seq samples to the Chinese Spring transcriptome  
582 reference IWGSC RefSeq Annotation v1.1 [37], following default parameters previously shown to  
583 result in accurate homeolog-specific read mapping in polyploid wheat [36,50]. Tximport v1.2.0 was  
584 then used to summarise expression levels from transcript to gene level (**S1 Text**).

585

#### 586 **Co-expression network construction**

587 The WGCNA package in R [51,52] was used to construct the scale-free co-expression network.  
588 Metadata for all samples were assigned with 8 tissue types (average 16.25; median 14.5 replicates per  
589 factor). Only high confidence (HC) genes [37] with expression  $> 0.5$  TPM in at least one meiosis  
590 sample were retained for co-expression network construction using the R Package WGCNA (version  
591 1.66) [51,52]. Using the varianceStabilizingTransformation() function from DESeq2 [135], the count  
592 expression level of selected genes was normalised to eliminate differences in sequencing depth  
593 between different RNA-Seq studies (**S2 Text**). To select a soft power threshold ( $\beta$ ) for adjacency  
594 calculation (as  $a_{ij} = |s_{ij}|^\beta$ ; where  $s_{ij}$  is the correlation between gene  $i$  and gene  $j$ ), the Scale-free  
595 Topology Criterion was used [136]. Using the pickSoftThreshold() function to calculate  $\beta$  values, the  
596 soft power threshold emphasising strong correlations between genes and penalising weak correlations  
597 was selected as the first power to exceed a scale-free topology fit index of 0.9 [36] (**S3 Text**). The  
598 correlation type used to calculate adjacency matrices was biweight midcorrelation (bicor). The  
599 adjacency matrices were transformed into a topological overlap matrix (TOM), measuring the  
600 network connectivity of a gene defined as the sum of its adjacency with all other genes for network  
601 generation. The blockwiseModules() function was used to calculate matrices and construct blockwise  
602 networks considering the following parameters: network type (networkType) = “signed hybrid”,

603 maximum block size (maxBlockSize) = 46,000 genes, soft power threshold (power) = 7, correlation  
604 type (corType) = “bicor” (biweight midcorrelation with maxPOutliers set to 0.05 to eliminate effects  
605 of outlier samples), topological overlap matrices type (TOMType) = “unsigned” with the  
606 mergeCutHeight = 0.15 and the minModuleSize = 30 to classify genes with similar expression  
607 profiles into gene modules using average linkage hierarchical clustering, according to the TOM-based  
608 dissimilarity measure with a minimum module size of 30 genes (**S4 Text**). Module Eigengene (MEs),  
609 summarising the expression patterns of all genes within a given module into a single characteristic  
610 expression profile, were calculated as the first principal component in the Principal Component  
611 Analysis (PCA) using the moduleEigengenes() function (**S4 Text**).

612

### 613 **Identifying meiosis-related modules**

614 The module eigengenes was used to test correlations between gene modules and traits (8 tissue types)  
615 using the cor() function. To assess the significance of correlations, Student asymptotic *P* values for  
616 correlations were calculated using the function corPvalueStudent(), and corrected for multiple testing  
617 by calculating FDR (false discovery rate) using a p.adjust() function following the Benjamini &  
618 Yekutieli [137] method. We considered a module meiosis-related when its correlation was strong with  
619 meiosis samples ( $r > 0.5$  and  $FDR < 0.05$ ) and weak ( $r < 0.3$ ) or negative with other type of tissues  
620 (**S5 Text**).

621

### 622 **Analysis of GO term enrichment in modules**

623 GO term enrichment was calculated using the “goseq” package [138]. Gene ontology (GO)  
624 annotations of IWGSC RefSeq v1.0 genes were retrieved from the file “FunctionalAnnotation.rds” in  
625 [https://opendata.earlham.ac.uk/wheat/under\\_license/toronto/Ramirez-Gonzalez\\_etal\\_2018-06025-  
626 Transcriptome-Landscape/data/TablesForExploration/FunctionalAnnotation.rds](https://opendata.earlham.ac.uk/wheat/under_license/toronto/Ramirez-Gonzalez_etal_2018-06025-Transcriptome-Landscape/data/TablesForExploration/FunctionalAnnotation.rds) [36] by filtering for  
627 ontology “IWGSC+Stress”. GO data was then converted to IWGSC RefSeq Annotation v1.1 by  
628 replacing “01G” by “02G” in the IWGSC v1.0 gene IDs and retaining only genes > 99 % similar with  
629 > 90% coverage in the v1.0 and v1.1 annotation versions (as determined by blastn of the cDNAs)  
630 (called “all\_go”). *P* values for GO term enrichment were calculated using the goseq() function (using

631 the following parameters: the pwf object was created using the nullp() function which calculated a  
632 Probability Weighting Function for the genes v1.1 based on their length, the gene2cat = all\_go, and  
633 test.cats = "GO:BP", to specify the Biological Process GO term category to test for over  
634 representation amongst the inquired genes) and corrected using the FDR method [139]. A GO term  
635 was considered enriched in a module when FDR adjusted  $P$  value  $< 0.05$  (S6 Text). All figures shown  
636 for enriched GO terms in the modules were produced using RAWGraphs software [140].

637

### 638 **Orthologs of MGs in wheat**

639 A comprehensive literature search was performed for MGs in model plant species (mainly *A. thaliana*  
640 and rice; S17 Table), identifying gene IDs based on the “Os-Nipponbare-Reference-IRGSP-1.0” for  
641 rice (*Oryza sativa* Japonica Group) and “TAIR10” for *A. thaliana*. Wheat orthologs of MGs were then  
642 retrieved from *Ensembl* Plants Genes 43 database through BioMart (in;  
643 <http://plants.ensembl.org/biomart>) where orthologs calculated according to Vilella et al. [141] using  
644 the following gene datasets: “Triticum aestivum genes (IWGSC)”, “Oryza sativa Japonica Group  
645 genes (IRGSP-1.0)” and “Arabidopsis thaliana genes (TAIR10)” for wheat [37], rice [142,143] and  
646 Arabidopsis [144], respectively. For genes with no orthologs identified using this method, potential  
647 wheat orthologs were identified by searching for amino acid sequence similarity using BLASTP [145]  
648 in *Ensembl*Plants according to the following criteria: E-value  $< 1e-10$ ; ID%  $> 25\%$  with Arabidopsis  
649 and  $> 70\%$  with rice; then only wheat genes for which *Ensembl*Plants did not list any orthologs in rice  
650 and Arabidopsis were considered as orthologs of MGs. Finally, 407 wheat gene IDs were identified as  
651 orthologs of 103 plant MGs (listed in S5 Table). This group of genes was referred to in this study as  
652 “Orthologs”.

653

### 654 **Wheat genes with MG ontology (GO)**

655 A total number of 46,909 GO terms used by Ramírez-González et al. [36] to calculate GO term  
656 accessions for wheat genes (IWGSC v1.0 gene annotation) were filtered for meiosis-related GO  
657 terms, using 15 meiosis-specific keywords (“meiosis”, “meiotic”, “synapsis”, “synaptonemal”,  
658 “prophase I”, “metaphase I”, “anaphase I”, “telophase I”, “leptotene”, “zygotene”, “pachytene”,

659 “diplotene”, “chiasma”, “crossover” and “homologous chromosome segregation”). A total of 284  
660 meiosis GO accessions were identified and used to retrieve 927 wheat genes with potential roles  
661 during meiosis (**S7 Table**). All genes identified by gene orthologs and gene ontology methods were  
662 then filtered to retain only genes had expression > 0.5 TPM in at least one meiosis sample. This group  
663 of genes was referred to in this paper as “Meiotic GO”. Enrichment analysis for the genes from  
664 “Orthologs” and “Meiotic GO” groups in all module was conducted (**S7 Text**). The number of genes  
665 from each group was assessed in all modules and compared with the expected number based on the  
666 module size. There was a set of genes overlapping between “Orthologs” and “Meiotic GO” groups,  
667 which was considered in the “Orthologs” group when undertaking gene enrichment analysis. Fisher’s  
668 exact test was used to calculate significant enrichment in the modules. Gene group considered over-  
669 or under-represented in a module when  $P < 0.5$ .

670

#### 671 **Identifying highly connected hub genes**

672 Hub genes within each module were identified using the WGCNA R package function signedKME()  
673 to calculate the correlation between expression patterns of each gene and the module eigengene. Hub  
674 genes were considered those more highly correlated to the eigengene (**S8 Text**).

675

#### 676 **Assessment of TF families in modules**

677 A total of 4889 wheat HC genes (IWGSC RefSeq Annotation v1.1; [37]) belonging to 58 TF families  
678 were predicted from the annotation of the wheat genome sequence ([https://github.com/Borrill-  
679 Lab/WheatFlagLeafSenescence/blob/master/data/TFs\\_v1.1.csv](https://github.com/Borrill-Lab/WheatFlagLeafSenescence/blob/master/data/TFs_v1.1.csv)). The number of TFs from each family  
680 was assessed in all modules and compared with the expected number based on the module size.  
681 Fisher’s exact test was used to calculate significant enrichment of TFs in the modules. TF family  
682 considered over- or under-represented in a module when  $P < 0.5$  (**S9 Text**).

683

#### 684 **Defining gene categories based on number of homeologs**

685 A list of homeologs for all HC hexaploid wheat genes (IWGSC v1.1 gene annotation; [37]) was  
686 retrieved from *Ensembl* Plants Genes 43 database through BioMart (in;

687 <http://plants.ensembl.org/biomart>). Based on number of homeologs from each of the A-, B- and D-  
688 sub-genomes, genes were assigned to four groups: triads that refer to 1:1:1 triads (with a single copy  
689 from each of the A-, B- and D-sub-genomes); duplets referring to 1:1:0, 1:0:1 and 0:1:1 duplets;  
690 monads group containing genes with no homeologs (e.g. 0:0:1); and “others” containing genes with  
691 more than two homeologs, in conjunction with genes from the homeologous groups 0:1:2, 0:2:1,  
692 1:0:2, 2:0:1, 1:2:0, 2:1:0, 2:0:0, 0:2:0 and 0:0:2. Accordingly, 19801 triads (59403 genes), 7565  
693 duplets (15130 genes), 15109 monads (single-copy genes) and 18250 genes from the “Others” group  
694 were identified (**S1 Table**).

695

### 696 **Defining gene categories based on homeolog expression patterns in triads**

697 Homeolog expression pattern in triads was determined for each of the eight tissue types (**S10 Text**,  
698 first part). For triads it was calculated according to Ramírez-González *et al.* [36] where a triad can be  
699 described as balanced, A dominant, A suppressed, B dominant, B suppressed, D dominant or D  
700 suppressed, based on the relative expression contribution of its A, B and D homeologs. Triads were  
701 defined as expressed when one of its homeologs was expressed according to the criterion used in our  
702 WGCNA analysis (**S18 Table**). This insured that all triads contain genes from modules were included  
703 in the homeolog expression bias analysis (**S10 Text**, second part). Genes from a triad might not  
704 belong to the same module due to dissimilarity of their expression patterns. Thus, to allow the  
705 assessment of the expression pattern of genes in each module, each homeolog (A, B and D  
706 homeologs) in a triad was assigned to one of the three categories “Balanced”, “Dominant” and  
707 “Suppressed” based on the homeolog origin (A, B and D sub-genome) and the triad description  
708 (balanced, A dominant, A suppressed, B dominant, B suppressed, D dominant or D suppressed) as  
709 shown in **S19 Table**. The values of the relative contributions of each homeolog per triad were used to  
710 plot the ternary diagrams using the R package ggtern [146].

711

### 712 **Co-expression gene network visualisation**

713 Cytoscape software (version 3.7.1; [119]) was used to visualise the network described in this study.  
714 Firstly, the “exportNetworkToCytoscape” function was used to create edge files which could be used

715 to visualize the network, then depending on network complexity, different weight value thresholds  
716 were used to filter genes to be visualised (**S11 Text**). The term ‘weight value’ in the input files for  
717 Cytoscape refers to the connection strength between two nodes (genes) in terms of correlation value  
718 obtained from the topological overlap matrices (TOM). The co-expression network data has also been  
719 integrated with the wheat knowledge network [132] to make it publicly accessible through the  
720 KnetMiner web application (<http://knetminer.rothamsted.ac.uk>; [133]. The data was semantically  
721 modelled as nodes of type Gene, Co-Expression-Module, Co-Expression-Study, GOterm; connected  
722 by relations of type part-of and enriched. Each module was given a unique identifier composed of the  
723 module number and the prefix “AKA”. KnetMiner can be searched with keywords (incl. module ID  
724 and GO terms) and wheat gene identifiers.

725

## 726 **Data availability**

727 All data files used in this manuscript are deposited in the Earlham Institute Open Data Platform  
728 ([https://opendata.earlham.ac.uk/wheat/under\\_license/toronto/Martin\\_et\\_al\\_2018\\_Alabdullah\\_et\\_al\\_2019\\_wheat\\_meiosis\\_transcriptome\\_and\\_co-expression\\_network/](https://opendata.earlham.ac.uk/wheat/under_license/toronto/Martin_et_al_2018_Alabdullah_et_al_2019_wheat_meiosis_transcriptome_and_co-expression_network/)). All R scripts are provided as .text  
729 files in the Supporting Information. The Gene network data will become accessible and searchable  
730 through the public plant website, KnetMiner (<http://knetminer.rothamsted.ac.uk>) with its next update  
731 this August.

732

## 734 **Acknowledgements**

735 This work was supported by the UK biotechnology and Biological Sciences Research Council  
736 (BBSRC) through a grant as part of Designing Future Wheat (DFW) Institute Strategic Programme  
737 (BB/P016855/1) and response mode grant (BB/R007233/1).

738

## 739 **Author Contributions**

740 **Conceptualization:** Abdul Kader Alabdullah, Philippa Borrill, Azahara C. Martin, Cristobal Uauy,  
741 Graham Moore.

742 **Data curation:** Abdul Kader Alabdullah, Azahara C. Martin, Ricardo H. Ramirez-Gonzalez, Keywan

743 Hassani-Pak.

744 **Formal analysis:** Abdul Kader Alabdullah

745 **Funding acquisition:** Graham Moore, Peter Shaw.

746 **Methodology:** Abdul Kader Alabdullah, Philippa Borrill, Cristobal Uauy, Graham Moore.

747 **Software:** Abdul Kader Alabdullah, Philippa Borrill, Ricardo H. Ramirez-Gonzalez, Keywan

748 Hassani-Pak.

749 **Supervision:** Graham Moore, Peter Shaw.

750 **Writing – original draft:** Abdul Kader Alabdullah

751 **Writing – review & editing:** Abdul Kader Alabdullah, Philippa Borrill, Azahara C. Martin, Ricardo

752 H. Ramirez-Gonzalez, Keywan Hassani-Pak, Cristobal Uauy, Peter Shaw and Graham Moore.

753

754

## 755 **References**

756 1. Kleckner N. Meiosis: how could it work?. *Proc Natl Acad Sci USA*. 1996;93: 8167–8174.

757 2. Mercier R, Mézard C, Jenczewski E, Macaisne N, Grelon M. The Molecular Biology of  
758 Meiosis in Plants. *Annu Rev Plant Biol*. 2015;66: 297-327. doi: 10.1146/annurev-arplant-  
759 050213-035923.

760 3. Zickler D. and Kleckner N. Recombination, Pairing, and Synapsis of Homologs during  
761 Meiosis. *Cold Spring Harb Perspect Biol* 2015;7:a016626. doi: 10.1101/cshperspect.a016626

762 4. Capilla L, Garcia Caldés M, Ruiz-Herrera A. Mammalian Meiotic Recombination: A Toolbox  
763 for Genome Evolution. *Cytogenet Genome Res*. 2016;150: 1-16.

764 5. Melamed-Bessudo C, Shilo S, Levy AA. Meiotic recombination and genome evolution in  
765 plants. *Curr Opin Plant Biol*. 2016;30: 82–87.

766 6. Wijnker E, de Jong H. Managing meiotic recombination in plant breeding. *Trends Plant*  
767 *Sci*. 2008;12: 640-6. doi: 10.1016/j.tplants.2008.09.004.

- 768 7. Choi K. Advances towards Controlling Meiotic Recombination for Plant Breeding. *Mol*  
769 *Cells*. 2017;40(11): 814-822. doi: 10.14348/molcells.2017.0171.
- 770 8. Fernandes JB, Séguéla-Arnauda M, Larchevêquea C, Lloyd AH, Merciera R. Unleashing  
771 meiotic crossovers in hybrid plants. *PNAS*. 2018;115: 10.2431-2436.
- 772 9. Alix K, Gérard PR, Schwarzacher T, Heslop-Harrison JS. Polyploidy and interspecific  
773 hybridization: partners for adaptation, speciation and evolution in plants. *Ann Bot*. 2017;120:  
774 183-194. doi:10.1093/aob/mcx079.
- 775 10. Comai L. The advantages and disadvantages of being polyploid. *Nat Rev Genet*. 2005;6: 836–  
776 846. doi:10.1038/nrg1711.
- 777 11. Ramsey J, Schemske D. Neopolyploidy in flowering plants. *Annu Rev Ecol Syst*. 2002;33:  
778 589-639.
- 779 12. Stenberg P, Saura A. Meiosis and its deviations in polyploid animals. *Cytogenet Genome Res*.  
780 2013;140: 185–203. doi:10.1159/000351731.
- 781 13. Kobayashi T, Hotta Y, Tabata S. Isolation and characterization of a yeast gene that is  
782 homologous with a meiosis-specific cDNA from a plant. *Mol. Gen. Genet*. 1993;237: 225-  
783 232.
- 784 14. Kobayashi T, Kobayashi E, Sato S, Hotta Y, Miyajima N, Tanaka A, Tabata S.  
785 Characterization of cDNAs induced in meiotic prophase in lily microsporocytes. *DNA Res*.  
786 1994;1: 15-26.
- 787 15. Mercier R, Grelon M. Meiosis in plants: ten years of gene discovery. *Cytogenet Genome Res*.  
788 2008;120(3-4): 281-90. doi: 10.1159/000121077.
- 789 16. Luo Q, Li Y, Shen Y, Cheng Z. Ten Years of Gene Discovery for Meiotic Event Control in  
790 Rice. 2014;41(3): 125-137.
- 791 17. Blary A Jenczewski E. Manipulation of crossover frequency and distribution for plant  
792 breeding. *Theor Appl Genet*. 2019;132(3): 575-592. doi: 10.1007/s00122-018-3240-1.
- 793 18. Riley R, Chapman V. Genetic control of the cytologically diploid behaviour of hexaploid  
794 wheat. *Nature*. 1958;182: 713–715.
- 795 19. Riley R. The diploidisation of polyploid wheat. *Ibid*. 1960;15: 407-429.



- 796 20. Holm PB. Chromosome pairing and chiasma formation in allohexaploid wheat, triticum  
797 aestivum analyzed by spreading of meiotic nuclei. *Carlsberg Res. Commun.* 1986;51: 239-  
798 294.
- 799 21. Martinez-Perez E, Shaw P, Moore G. Polyploidy induces centromere association. *J Cell Biol*  
800 2000;148: 233-238.
- 801 22. Martinez-Perez E, Shaw P, Aragon-Alcaide L, Moore G. Chromosomes form into seven  
802 groups in hexaploid and tetraploid wheat as a prelude to meiosis. *Plant J.* 2003;36: 21–29.
- 803 23. Riley R, Chapman V, Johnson R. The incorporation of alien disease resistance in wheat by  
804 genetic interference with the regulation of meiotic chromosomal synapsis. *Genet Res.*  
805 1968;12: 199-219.
- 806 24. Holm PB. Chromosome pairing and synaptonemal complex formation in hexaploid wheat,  
807 monosomic for chromosome 5B. *Carlsberg Res Commun.* 1988;53: 57-89.
- 808 25. Holm PB, Wang X. The effect of chromosome 5B on synapsis and chiasma formation in  
809 wheat, *Triticum aestivum* cv. Chinese Spring. *Carlsberg Res Commun.* 1988;53: 191-208.
- 810 26. Feldman M. Cytogenetic Activity and Mode of Action of the Pairing Homoeologous (Ph1)  
811 Gene of Wheat. *Crop Sci.* 1993;33: 894-897.
- 812 27. Aragon-Alcaide L, Reader S, Miller T, Moore G. Centromeric behaviour in wheat with high  
813 and low homoeologous chromosomal pairing. *Chromosoma.* 1997;106: 327-33.
- 814 28. Martinez-Perez E, Shaw P, Moore G. The Ph1 locus is needed to ensure specific somatic and  
815 meiotic centromere pairing. *Nature.* 2001;411: 204-208.
- 816 29. Prieto P, Shaw P. and Moore G. Homologue recognition during meiosis is associated with a  
817 change in chromatin conformation. *Nature Cell Biol.* 2004;6: 906-908.
- 818 30. Colas I, Shaw P, Prieto P, Wanous M, Spielmeier W, Mago R, Moore G. Effective  
819 chromosome pairing requires chromatin remodeling at the onset of meiosis. *Proc Natl Acad*  
820 *Sci USA.* 2008;105(16): 6075-80. doi: 10.1073/pnas.0801521105.
- 821 31. Martín AC, Rey MD, Shaw P, Moore G. Dual effect of the wheat Ph1 locus on chromosome  
822 synapsis and crossover. *Chromosoma.* 2017; doi:10.1007/s00412-017-0630-0.

- 823 32. Rey MD, Martín AC, Smedley M, Hayta S, Harwood W, Shaw P, et al. Magnesium increases  
824 homoeologous crossover frequency during meiosis in ZIP4 (Ph1 Gene) mutant wheat-wild  
825 relative hybrids. *Front Plant Sci.* 2018;9: 509. doi:10.3389/fpls.2018.00509.
- 826 33. Martín AC, Borrill P, Higgins J, Alabdullah A, Ramírez-González, RH, Swarbreck D, et al.  
827 Genome-Wide Transcription During Early Wheat Meiosis Is Independent of Synapsis, Ploidy  
828 Level, and the Ph1 Locus. *Front Plant Sci.* 2018;9:1 791. doi: 10.3389/fpls.2018.01791.
- 829 34. Jiao Y, Wickett NJ, Ayyampalayam S., Chanderbali, A.S., Landherr, L., Ralph, E., et al.  
830 Ancestral polyploidy in seed plants and angiosperms. *Nature.* 2011;473: 97–100.  
831 doi:10.1038/nature09916.
- 832 35. Lloyd AH, Ranoux M, Vautrin S, Glover N, Fourment J, Charif D, et al. Meiotic gene  
833 evolution: Can you teach a new dog new tricks? *Mol Biol Evol.* 2014;31: 1724-1727.
- 834 36. Ramírez-González RH, Borrill P, Lang D, Harrington SA, Brinton J, Venturini L, et al. The  
835 transcriptional landscape of polyploid wheat. *Science.* 2018;361: eaar6089. doi:  
836 10.1126/science.aar6089.
- 837 37. International Wheat Genome Sequencing Consortium (IWGSC). Shifting the limits in wheat  
838 research and breeding using a fully annotated reference genome. *Science.* 2018;361:  
839 eaar7191. doi: 10.1126/science.aar7191.
- 840 38. Edger PP, Smith R, McKain MR, Cooley AM, Vallejo-Marin M, Yuan Y, et al. Subgenome  
841 dominance in an interspecific hybrid, synthetic allopolyploid, and a 140-year-old naturally  
842 established neo-allopolyploid monkeyflower. *Plant Cell.* 2017;29: 2150-2167.
- 843 39. Freeling M. Bias in plant gene content following different sorts of duplication: Tandem,  
844 whole-genome, segmental, or by transposition. *Annu. Rev. Plant Biol.* 2009;60: 433-453.
- 845 40. Usadel B, Obayashi T, Mutwil M, Giorgi FM, Bassel GW, Tanimoto M, et al. Coexpression  
846 tools for plant biology: opportunities for hypothesis generation and caveats. *Plant Cell*  
847 *Environ.* 2009;32: 1633–1651.
- 848 41. He F, Maslov S. Pan- and core- network analysis of co-expression genes in a model plant. *Sci*  
849 *Rep.* 2016;6: 38956. DOI: 10.1038/srep38956.

- 850 42. Krishnan A, Gupta C, Ambavaram MMR, Pereira A. RECoN: Rice Environment  
851 Coexpression Network for Systems Level Analysis of Abiotic-Stress Response. *Front. Plant*  
852 *Sci.* 2017;8: 1640. doi: 10.3389/fpls.2017.01640.
- 853 43. Ma X, Zhao H, Xu W, You Q, Yan H, Gao Z, Su Z. Co-expression Gene Network Analysis  
854 and Functional Module Identification in Bamboo Growth and Development. *Front. Genet.*  
855 2018;9: 574. doi: 10.3389/fgene.2018.00574.
- 856 44. Liu W, Lin L, Zhang Z, Liu S, Gao K, Lv Y, Tao H, He H. Gene co-expression network  
857 analysis identifies trait-related modules in *Arabidopsis thaliana*. *Planta.* 2019;249: 1487.  
858 <https://doi.org/10.1007/s00425-019-03102-9>.
- 859 45. Yu H, Jiao B, Lu L, Wang P, Chen S, Liang C, et al. NetMiner-an ensemble pipeline for  
860 building genome-wide and high-quality gene coexpression network using massive-scale  
861 RNA-seq. *PLoS ONE.* 2018;13(2): e0192613. <https://doi.org/10.1371/journal.pone.0192613>.
- 862 46. Tan M, Cheng D, Yang Y, Zhang G, Qin M, Chen J, et al. Co-expression network analysis of  
863 the transcriptomes of rice roots exposed to various cadmium stresses reveals universal  
864 cadmium-responsive genes. *BMC Plant Biol.* 2017;17: 194. [https://doi.org/10.1186/s12870-](https://doi.org/10.1186/s12870-017-1143-y)  
865 [017-1143-y](https://doi.org/10.1186/s12870-017-1143-y)
- 866 47. Aya K, Suzuki G, Suwabe K, Hobo T, Takahashi H, Shiono K, et al. Comprehensive Network  
867 Analysis of Anther-Expressed Genes in Rice by the Combination of 33 Laser Microdissection  
868 and 143 Spatiotemporal Microarrays. *PLoS ONE.* 2011;6(10): e26162. doi:  
869 [10.1371/journal.pone.0026162](https://doi.org/10.1371/journal.pone.0026162).
- 870 48. Silva AT, Ribone PA, Chan RL, Ligterink W, Hilhorst HW. A predictive co-expression  
871 network identifies novel genes controlling the seed-to-seedling phase transition  
872 in *Arabidopsis thaliana*. *Plant Physiol.* 2016;170: 2218–2231. doi: 10.1104/pp.15.01704.
- 873 49. Costa MC, Righetti K, Nijveen H, Yazdanpanah F, Ligterink W, Buitink J, et al. A gene co-  
874 expression network predicts functional genes controlling the re-establishment of desiccation  
875 tolerance in germinated *Arabidopsis thaliana* seeds. *Planta.* 2015;242: 435-449. doi:  
876 [10.1007/s00425-015-2283-7](https://doi.org/10.1007/s00425-015-2283-7)

- 877 50. Borrill P, Ramirez-Gonzalez R, Uauy C. expVIP: A customisable RNA-seq data analysis and  
878 visualization platform. *Plant Physiol.* 2016;170: 2172-2186. doi: 10.1104/pp.15.01667.
- 879 51. Langfelder P, Horvath S. WGCNA: An R package for weighted correlation network analysis.  
880 *BMC Bioinformatics.* 2008;9: 559. doi: 10.1186/1471-2105-9-559.
- 881 52. Langfelder P, Horvath S. Fast R Functions for Robust Correlations and Hierarchical  
882 Clustering. *J Stat Softw.* 2012;46: 11, 1-17. URL <http://www.jstatsoft.org/v46/i11/>.
- 883 53. Ji LH, Langridge P. An early meiosis cDNA clone from wheat. *Mol. Gen. Genet.* 1994;243:  
884 17-23.
- 885 54. Boden SA, Shadiac N, Tucker EJ, Langridge P, Able JA. Expression and functional analysis  
886 of TaASY1 during meiosis of bread wheat (*Triticum aestivum*). *BMC Mol. Biol.* 2007;8: 65.  
887 <http://www.biomedcentral.com/1471-2199/8/65>.
- 888 55. Boden SA, Langridge P, Spangenberg G, Able JA. TaASY1 promotes homologous  
889 chromosome interactions and is affected by deletion of Ph1. *Plant J.* 2009;57: 487-497. doi:  
890 10.1111/j.1365-313X.2008.03701.x
- 891 56. Lloyd AH, Milligan SA, Langridge P, Able JA. TaMSH7: A cereal mismatch repair gene that  
892 affects fertility in transgenic barley (*Hordeum vulgare* L.). *BMC Plant Biol.* 2007;7: 67.  
893 doi:10.1186/1471-2229-7-67
- 894 57. Khoo KHP, Jolly HR, Able JA. The RAD51 gene family in bread wheat is highly conserved  
895 across eukaryotes, with RAD51A1 upregulated during early meiosis. *Funct Plant Biol*  
896 2008;35: 1267-1277.
- 897 58. Devisetty UK, Mayes K, Mayes S. The RAD51 and DMC1 homoeologous genes of bread  
898 wheat: cloning, molecular characterization and expression analysis. *BMC Res Notes* 2010;3:  
899 245.
- 900 59. Khoo KHP, Able AJ, Able JA. Poor Homologous Synapsis 1 Interacts with Chromatin but  
901 Does Not Colocalise with ASynapsis 1 during Early Meiosis in Bread Wheat. *Int J Plant*  
902 *Genomics.* 2012;23: 514398. DOI: 10.1155/2012/514398.

- 903 60. Gardiner L-J, Wingen LU, Bailey P, Joynson R, Brabbs T, Wright J, et al. Analysis of the  
904 recombination landscape of hexaploid bread wheat reveals genes controlling recombination  
905 and gene conversion frequency. *Genome Biol.* 2019;20: 6. [https://doi.org/10.1186/s13059-](https://doi.org/10.1186/s13059-019-1675-6)  
906 019-1675-6
- 907 61. Caryl AP, Armstrong SJ, Jones GH, Franklin FC. A homologue of the yeast HOP1 gene is  
908 inactivated in the Arabidopsis meiotic mutant *asy1*. *Chromosoma.* 2000;109: 62-71. doi:  
909 10.1007/s004120050413.
- 910 62. Armstrong SJ, Caryl AP, Jones GH, Franklin FCH. *Asy1*, a protein required for meiotic  
911 chromosome synapsis, localizes to axis-associated chromatin in Arabidopsis and Brassica. *J.*  
912 *Cell Sci.* 2002;115: 3645-3655. doi: 10.1242/jcs.00048.
- 913 63. Klimyuk VI, Jones JDG. *AtDMC1*, the Arabidopsis homologue of the yeast *DMC1* gene:  
914 characterization, transposon-induced allelic variation and meiosis-associated expression. *Plant*  
915 *J.* 1997;11: 1-14. doi: 10.1046/j.1365-313X.1997.11010001.x.
- 916 64. Trapp O, Seeliger K, Puchta H. Homologs of breast cancer genes in plants. *Front. Plant Sci.*  
917 2011;2: 19. doi: 10.3389/fpls.2011.00019.
- 918 65. Lam WS, Yang X, Makaroff CA. Characterization of Arabidopsis thaliana *SMC1* and *SMC3*:  
919 evidence that *AtSMC3* may function beyond chromosome cohesion. *J Cell Sci* 2005;118:  
920 3037-3048. doi:10.1242/jcs.02443.
- 921 66. Gonzalo A, Lucas M-O, Charpentier C, Sandmann G, Lloyd A, Jenczewski E. Reducing  
922 *MSH4* copy number prevents meiotic crossovers between non-homologous chromosomes in  
923 *Brassica napus*. *Nature commun.* 2019;10:2354. <https://doi.org/10.1038/s41467-019-10010-9>.
- 924 67. Ling HQ, Zhao S, Liu D, Wang J, Sun H, Zhang C, et al. Draft genome of the wheat A-  
925 genome progenitor *Triticum urartu*. *Nature.* 2013; 496(7443): 87-90. doi:  
926 10.1038/nature11997
- 927 68. Luo MC, Gu YQ, Puiu D, Wang H, Twardziok SO, Deal KR, et al. Genome sequence of the  
928 progenitor of the wheat D genome *Aegilops tauschii*. *Nature.* 2017;551: 498-502. doi:  
929 10.1038/nature24486.

- 930 69. Avni R, Nave M, Barad O, Baruch K, Twardziok SO, Gundlach H, et al. Wild emmer genome  
931 architecture and diversity elucidate wheat evolution and domestication. *Science*.  
932 2017;357(6346): 93-97. DOI: 10.1126/science.aan0032.
- 933 70. Marcussen T, Sandve SR, Heier L, Spannagl M, Pfeifer M, The International Wheat Genome  
934 Sequencing Consortium, et al. Ancient hybridizations among the ancestral genomes of bread  
935 wheat. *Science*. 2014;345(6194): 1250092. DOI: 10.1126/science.1250092.
- 936 71. Scannell DR, Byrne KP, Gordon JL, Wong S, Wolfe KH. Multiple rounds of speciation  
937 associated with reciprocal gene loss in polyploid yeasts. *Nature*. 2006;440: 341-345.
- 938 72. Choulet F, Alberti A, Theil S, Glover N, Barbe V, Daron J, et al. Structural and functional  
939 partitioning of bread wheat chromosome 3B. *Science*. 2014;345: 1249721. doi:  
940 10.1126/science.1249721
- 941 73. Akhunov ED, Akhunova AR, Linkiewicz AM, Dubcovsky J, Hummel D, Lazo G, et  
942 al. Synteny perturbations between wheat homoeologous chromosomes caused by locus  
943 duplications and deletions correlate with recombination rates. *Proc Natl Acad Sci*  
944 *USA*. 2003;100: 10836-10841. doi:10.1073/pnas.1934431100.
- 945 74. Schreiber AW, Hayden MJ, Kerrie L Forrest KL, Kong SL, Langridge P, Baumann U.  
946 Transcriptome-scale homoeolog-specific transcript assemblies of bread wheat. *BMC*  
947 *Genomics*. 2012;13: 492. doi: 10.1186/1471-2164-13-492.
- 948 75. Chelysheva L, Gendrot G, Vezon D, Doutriaux MP, Mercier R, Grelon M. Zip4/Spo22 is  
949 required for class I CO formation but not for synapsis completion in *Arabidopsis thaliana*.  
950 *PLoS Genet*. 2007;3(5): e83. doi:10.1371/journal.pgen.0030083.
- 951 76. Shen Y, Tang D, Wang K, Wang M, Huang J, Luo W, et al. ZIP4 in homologous  
952 chromosome synapsis and crossover formation in rice meiosis. *J of Cell Sci*. 2012;125: 2581-  
953 2591.
- 954 77. De Muyt A, Pyatnitskaya A, Andréani J, Ranjha L, Ramus C, Laureau R, et al. A meiotic  
955 XPF-ERCC1-like complex recognizes joint molecule recombination intermediates to promote  
956 crossover formation. *Genes Dev*. 2018; DOI: 10.1101/gad.308510.117

- 957 78. Wang L, Xu Z, Khawar MB, Chao Liu C, Li W. The histone codes for meiosis.  
958       Reproduction. 2017;154: R65–R79.
- 959 79. Oliver C, Pradillo M, Corredor E, Cuñado N. The dynamics of histone H3  
960       modifications is species-specific in plant meiosis. *Planta*. 2013;238(1): 23-33. doi:  
961       10.1007/s00425-013-1885-1.
- 962 80. Maleki S & Keeney S 2004 Modifying histones and initiating meiotic recombination. *Cell*  
963       118 404–406. (doi:10.1016/j.cell.2004.08.008)
- 964 81. Hu JL, Donahue G, Dorsey J, Govin J, Yuan ZF, Garcia BA, et al. H4K44 acetylation  
965       facilitates chromatin accessibility during meiosis. *Cell Reports*. 2015;13: 1772–1780.  
966       doi:10.1016/j.celrep.2015.10.070.
- 967 82. Luense LJ, Wang XS, Schon SB, Weller AH, Shiao EL, Bryant JM, et al. Comprehensive  
968       analysis of histone post-translational modifications in mouse and human male germ cells.  
969       *Epigenetics and Chromatin*. 2016;9. doi:10.1186/s13072-016- 0072-6.
- 970 83. Xu Z, Song Z, Li G, Tu H, Liu W, Liu Y, et al. H2B ubiquitination regulates meiotic  
971       recombination by promoting chromatin relaxation. *Nucleic Acids Res*. 2016;44: 9681–9697.  
972       doi:10.1093/nar/gkw652.
- 973 84. Pawlowski WP, Golubovskaya IN, Timofejeva L, Robert B, Meeley RB, William F, et al.  
974       Coordination of Meiotic Recombination, Pairing, and Synapsis by PHS1. *Science*.  
975       2004;303(5654): 89-92. DOI: 10.1126/science.1091110.
- 976 85. Ronceret A, Doutriaux MP, Golubovskaya IN, Pawlowski WP. PHS1 regulates meiotic  
977       recombination and homologous chromosome pairing by controlling the transport of RAD50  
978       to the nucleus. *Proc Natl Acad Sci USA*. 2009;106(47): 20121-20126.
- 979 86. Alonso-Martin, S, Rochat A, Mademtoglou D, Morais J, de Reynies A, Aurade F, et al. Gene  
980       expression profiling of muscle stem cells identifies novel regulators of postnatal myogenesis.  
981       *Front. Cell Dev. Biol*. 2016;4: 58-58.

- 982 87. Antosch M, Schubert V, Holzinger P, Houben A, Grasser KD. Mitotic lifecycle of  
983 chromosomal 3xHMG-box proteins and the role of their N-terminal domain in the association  
984 with rDNA loci and proteolysis. *New Phytologist*. 2015;208: 1067-1077.
- 985 88. Pedersen DS, Coppens F, Ma L, Antosch M, Marktl B, Merkle T, et al. The plant-specific  
986 family of DNA-binding proteins containing three HMG-box domains interacts with mitotic  
987 and meiotic chromosomes. *New Phytologist*. 2011;192: 577-589.
- 988 89. Di Agostino S, Fedele M, Chieffi P, Fusco A, Rossi P, Geremia R, Sette C. Phosphorylation  
989 of high-mobility group protein A2 by Nek2 kinase during the first meiotic division in mouse  
990 spermatocytes. *Mol Biol Cell*. 2004;15: 1224-1232.
- 991 90. Tessari MA, Gostissa M, Altamura S, Sgarra R, Rustighi A, Salvagno C, et al. Transcriptional  
992 activation of the cyclin A gene by the architectural transcription factor HMGA2. *Mol Cell*  
993 *Biol*. 2003;23: 9104-9116.
- 994 91. Akiyama T, Kim JM, Nagata M, Aoki F. Regulation of histone acetylation during meiotic  
995 maturation in mouse oocytes. *Mol Reprod Dev*. 2004;69: 222-227.
- 996 92. Wang Q, Yin S, Ai JS, Liang CG, Hou Y, Chen DY, et al. Histone deacetylation is required  
997 for orderly meiosis. *Cell Cycle*. 2006;5: 766-74.
- 998 93. Magnaghi-Jaulin L, Jaulin C. Histone deacetylase activity is necessary for chromosome  
999 condensation during meiotic maturation in *Xenopus laevis*. *Chromosome Res*. 2006;14: 319-  
1000 332. DOI: 10.1007/s10577-006-1049-2.
- 1001 94. Getun IV, Wu Z, Fallahi M, Ouizem S, Liu Q, Li W, et al. Functional roles of acetylated  
1002 histone marks at mouse meiotic recombination hot spots. *Mol Cell Biol*. 2017;37: e00942-15.  
1003 [https:// doi.org/10.1128/MCB.00942-15](https://doi.org/10.1128/MCB.00942-15).
- 1004 95. Zheng N, Wang Z, Wei W. Ubiquitination-mediated degradation of cell cycle-related proteins  
1005 by F-box proteins. *Int J Biochem Cell Biol*. 2016;73: 99-110.
- 1006 96. Bolcun-Filas E, Bannister LA, Barash A, Schimenti KJ, Suzanne A. Hartford SA, et al. A-  
1007 MYB (MYBL1) transcription factor is a master regulator of male meiosis.  
1008 *Development*. 2011;138: 3319-3330. doi: 10.1242/dev.067645.



- 1009 97. Yan Z, Fan D, Meng Q, Yang J, Zhao W, Guo F, et al. Transcription factor ZFP38 is essential  
1010 for meiosis prophase I in male mice. *Reproduction*. 2016;152(5): 431-7. doi: 10.1530/REP-  
1011 16-0225.
- 1012 98. Xu L, Ajimura M, Padmore R, Klein C, Kleckner N. NDT80, a meiosis-specific gene  
1013 required for exit from pachytene in *Saccharomyces cerevisiae*. *Mol Cell Biol*. 1995;15: 6572-  
1014 6581.
- 1015 99. Horie S, Watanabe Y, Tanaka K, Nishiwaki S, Fujioka H, Abe H, et al.  
1016 The *Schizosaccharomyces pombe* mei4 + Gene Encodes a Meiosis-Specific Transcription  
1017 Factor Containing a forkhead DNA-Binding Domain. *Mol Cell Biol*. 1998;18(4): 2118-29.
- 1018 100. Pierce M, Benjamin KR, Montano SP, Georgiadis MM, Winter E, Vershon AK.  
1019 Sum1 and Ndt80 proteins compete for binding to middle sporulation element sequences that  
1020 control meiotic gene expression. *Mol Cell Biol*. 2003;23: 4814-4825.
- 1021 101. Beaudoin J, Ioannoni R, Normant V, Labbé S. A role for the transcription factor  
1022 Mca1 in activating the meiosis-specific copper transporter Mfc1. *PLoS ONE*. 2018;13(8):  
1023 e0201861. <https://doi.org/10.1371/journal.pone.0201861>
- 1024 102. Zhang J, Yan G, Tian M, Ma Y, Xiong J, Miao W. A DP-like transcription factor  
1025 protein interacts with E2f1 to regulate meiosis in *Tetrahymena thermophila*. *Cell*  
1026 *Cycle*. 2018;17(5): 634-642. doi: 10.1080/15384101.2018.1431595.
- 1027 103. Zwicker J, Liu N, Engeland K, Lucibello FC, Müller R. Cell cycle regulation of E2F  
1028 site occupation in vivo. *Science*. 1996;271(5255): 1595-7.
- 1029 104. Zheng N, Fraenkel E, Pabo CO, Pavletich NP. Structural basis of DNA recognition  
1030 by the heterodimeric cell cycle transcription factor E2F-DP. *Genes Dev*. 1999;13(6): 666-74.
- 1031 105. Sozzani R, Maggio C, Varotto S, Canova S, Bergounioux C, Albani D, Cella F.  
1032 Interplay between Arabidopsis Activating Factors E2Fb and E2Fa in Cell Cycle Progression  
1033 and Development. *Plant Physiol*. 2006;140(4): 1355-1366.
- 1034 106. Hollenhorst PC, Bose ME, Mielke MR, Müller U, Fox CA. Forkhead Genes in  
1035 Transcriptional Silencing, Cell Morphology and the Cell Cycle: Overlapping and Distinct

- 1036 Functions for FKH1 and FKH2 in *Saccharomyces cerevisiae*. *Genetics*. 2000;154(4): 1533-  
1037 1548
- 1038 107. Zhu G, Spellman PT, Volpe T, Brown PO, Botstein D, Davis TN, Futcher B. Two  
1039 yeast forkhead genes regulate the cell cycle and pseudohyphal growth.  
1040 *Nature*. 2000;406(6791): 90-4.
- 1041 108. Kim M, Ahn JW, Song K, Paek KH, Pai HS. Forkhead-associated Domains of the  
1042 Tobacco NtFHA1 Transcription Activator and the Yeast Fhl1 Forkhead Transcription Factor  
1043 Are Functionally Conserved. *J Biol Chem*. 2002;277: 38781-38790.
- 1044 109. Sun Z, Hsiao J, Fay DS, Stern DF. Rad53 FHA domain associated with  
1045 phosphorylated Rad9 in the DNA damage checkpoint. *Science*. 1998;281: 272-274.
- 1046 110. Bashkirov VI, Bashkirova EV, Haghazari E, Heyer WD. Direct kinase-to-kinase  
1047 signaling mediated by the FHA phosphoprotein recognition domain of the Dun1 DNA  
1048 damage checkpoint kinase. *Mol Cell Biol*. 2003;23: 1441-1452.
- 1049 111. Palmbo PL, Wu D, Daley JM, Wilson TE. Recruitment of *Saccharomyces cerevisiae*  
1050 Dnl4-Lif1 complex to a double-strand break requires interactions with Yku80 and the Xrs2  
1051 FHA domain. *Genetics*. 2008;180: 1809-1819.
- 1052 112. Liang J, Suhandynata RT, Zhou H. Phosphorylation of Sae2 Mediates Forkhead-  
1053 associated (FHA) Domain-specific Interaction and Regulates Its DNA Repair Function. *J Biol*  
1054 *Chem*. 2015;290: 10751-10763.
- 1055 113. Pérez-Hidalgo L, Moreno S, San-Segundo PA. Regulation of meiotic progression by  
1056 the meiosis-specific checkpoint kinase Mek1 in fission yeast. *J of Cell Sci*. 2003;116: 259-  
1057 271.
- 1058 114. Cigliano RA, Sanseverino W, Cremona G, Consiglio FM, Conicella C. Evolution of  
1059 parallel spindles like genes in plants and highlight of unique domain architecture. *BMC Evol*.  
1060 *Biol*. 2011;11: 78. doi: 10.1186/1471-2148-11-78.
- 1061 115. Crown KN, Savytskyy OP, Malik S, Logsdon J, Williams RS, Tainer JA, Zolan  
1062 MEA. Mutation in the FHA Domain of *Coprinus cinereus* Nbs1 Leads to Spo11-Independent

- 1063 Meiotic Recombination and Chromosome Segregation. *G3* (Bethesda). 2013;3(11): 1927-  
1064 1943.
- 1065 116. Dukowic-Schulze S, Harris A, Li J, Sundararajan A, Mudge J, Retzel EF, et al.  
1066 Comparative transcriptomics of early meiosis in *Arabidopsis* and maize. *J. Genet.*  
1067 *Genomics*. 2014;41: 139–152 10.1016/j.jgg.2013.11.007
- 1068 117. Ma J, Skibbe DS, Fernandes J, Walbot V. Male reproductive development:  
1069 gene expression profiling of maize anther and pollen ontogeny. *Genome Biol*. 2008;9:  
1070 R18110.1186/gb-2008-9-12-r181
- 1071 118. Krasileva KV, Vasquez-Gross HA, Howell T, Bailey P, Paraiso F, Clissold L, et al.  
1072 Uncovering hidden variation in polyploid wheat. *PNAS*, 2017;114: 6. E913-E921.
- 1073 119. Shannon P, Markiel A, Ozier O, Baliga NS, Wang JT, Ramage D, et al. Cytoscape: a  
1074 software environment for integrated models of biomolecular interaction networks. *Genome*  
1075 *Res*. 2003;13(11): 2498-504.
- 1076 120. Singh M, Goel S, Meeley RB, Dantec C, Parrinello H, Michaud C, et al. Production  
1077 of viable gametes without meiosis in maize deficient for an argonaute protein. *Plant Cell*.  
1078 2011;23(2): 443-58.
- 1079 121. Durán-Figueroa N, Vielle-Calzada JP. Argonaute9-dependent silencing of  
1080 transposable elements in pericentromeric regions of arabidopsis. *Plant Signal. Behav*.  
1081 2010;5(11): 1476-79.
- 1082 122. Li X, Chang Y, Xin X, Zhu C, Li X, Higgins JD, Wu C. Replication protein a2c  
1083 coupled with replication protein a1c regulates crossover formation during meiosis in rice.  
1084 *Plant Cell*. 2013;25(10): 3885-99.
- 1085 123. Domenichini S, Raynaud C, Ni DA, Henry Y, Bergounioux C. *Atmnd1-delta1* is  
1086 sensitive to gamma-irradiation and defective in meiotic dna repair. *DNA Repair (Amst)*.  
1087 2006;5(4): 455-64.

- 1088 124. Kerzendorfer C, Vignard J, Pedrosa-Harand A, Siwiec T, Akimcheva S, Jolivet S, et  
1089 al. The arabidopsis thaliana mnd1 homologue plays a key role in meiotic homologous pairing,  
1090 synapsis and recombination. *J. Cell Sci.* 2006;119(Pt 12): 2486-96.
- 1091 125. Hartung F, Suer S, Bergmann T, Puchta H. The role of atmus81 in dna repair and its  
1092 genetic interaction with the helicase atrecq4a. *Nucleic Acids Res.* 2006;34(16): 4438-48.
- 1093 126. Higgins JD, Buckling EF, Franklin FCH, Jones GH. Expression and functional  
1094 analysis of atmus81 in arabidopsis meiosis reveals a role in the second pathway of crossing-  
1095 over. *Plant J.* 2008;54(1): 152-62.
- 1096 127. Lu P, Wijeratne AJ, Wang Z, Copenhaver GP, Ma H. Arabidopsis ptd is required for  
1097 type i crossover formation and affects recombination frequency in two different chromosomal  
1098 regions. *J. Genet. Genomics.* 2014;41(3): 165-75.
- 1099 128. Wijeratne AJ, Chen C, Zhang W, Timofejeva L, Ma H. The arabidopsis thaliana  
1100 parting dancers gene encoding a novel protein is required for normal meiotic homologous  
1101 recombination. *Mol. Biol. Cell.* 2006;17(3): 1331-43.
- 1102 129. Watanabe Y, Yamamoto M. *S. pombe* mei2+ encodes an RNA-binding protein  
1103 essential for premeiotic DNA synthesis and meiosis I, which cooperates with a novel RNA  
1104 species meiRNA. *Cell.* 1994;78(3): 487-98.
- 1105 130. Watanabe Y, Shinozaki-Yabana S, Chikashige Y, Hiraoka Y, Yamamoto M.  
1106 Phosphorylation of RNA-binding protein controls cell cycle switch from mitotic to meiotic in  
1107 fission yeast. *Nature.* 1997;386: 187-190.
- 1108 131. Reddy TV, Kaur J, Agashe B, Sundaresan V, Siddiqi I. The duet gene is necessary for  
1109 chromosome organization and progression during male meiosis in arabidopsis and encodes a  
1110 phd finger protein. *Development.* 2003;130(24): 5975-87.
- 1111 132. Hassani-Pak K, Castellote M, Esch M, Hindle M, Lysenko A, Taubert J, Rawlings C.  
1112 Developing integrated crop knowledge networks to advance candidate gene discovery.  
1113 *Applied & Translational Genomics.* 2016;11: 18-26.  
1114 <https://doi.org/10.1016/j.atg.2016.10.003>.

- 1115 133. Hassani-Pak K, KnetMiner - An integrated data platform for gene mining and  
1116 biological knowledge discovery [dissertation]. Bielefeld: Universität Bielefeld; 2017.
- 1117 134. Bray NL, Pimentel H, Melsted P, Pachter L. Near-optimal probabilistic RNA-seq  
1118 quantification. *Nat. Biotechnol.* 2016;34: 525-527. doi: 10.1038/nbt.3519.
- 1119 135. Love MI, Huber W, Anders S. Moderated estimation of fold change and dispersion  
1120 for RNA-seq data with DESeq2. *Genome Biol.* 2014;15: 550. doi: 10.1186/s13059-014-0550-  
1121 8
- 1122 136. Zhang B, Horvath S. A General Framework for Weighted Gene Co-Expression  
1123 Network Analysis. *Stat Appl Genet Mol Biol.* 2005;4: Article 17. doi: 10.2202/1544-  
1124 6115.1128.
- 1125 137. Benjamini Y, Yekutieli D. The Control of the False Discovery Rate in Multiple  
1126 Testing under Dependency. *Ann. Stat.* 2001;29: 1165-1188.
- 1127 138. Young MD, Wakefield MJ, Smyth GK, Oshlack A. Gene ontology analysis for RNA-  
1128 seq: accounting for selection bias. *Genome Biol.* 2010;11: R14.
- 1129 139. Benjamini Y, Hochberg Y. Controlling the False Discovery Rate: A Practical and  
1130 Powerful Approach to Multiple Testing. *Journal of the Royal Statistical Society. Series B*  
1131 (Methodological), 1995;57(1): 289-300.
- 1132 140. Mauri M, Elli T, Caviglia G, Ubaldi G, Azzi M. RAWGraphs: A Visualisation  
1133 Platform to Create Open Outputs. CHIItaly '17. 2017;  
1134 <https://doi.org/10.1145/3125571.3125585>. [Software] Available at: <http://app.rawgraphs.io/>.
- 1135 141. Vilella AJ, Severin J, Ureta-Vidal A, Heng L, Durbin R, Birney E.  
1136 EnsemblComparaGeneTrees: Complete, duplication-aware phylogenetic trees in vertebrates.  
1137 *Genome Research.* Cold Spring Harbor Laboratory Press. 2009;19: 327-335.
- 1138 142. Sakai H, Lee SS, Tanaka T, Numa H, Kim J, Kawahara Y, et al. Rice Annotation  
1139 Project Database (RAP-DB): an integrative and interactive database for rice genomics. *Plant*  
1140 *Cell Physiol.* 2013;54(2): e6. doi: 10.1093/pcp/pcs183.

- 1141 143. Kawahara Y, de la Bastide M, Hamilton JP, Kanamori H, McCombie WR, Ouyang S,  
1142 et al. Improvement of the *Oryza sativa* Nipponbare reference genome using next generation  
1143 sequence and optical map data. *Rice (N Y)*. 2013;6(1): 4. doi: 10.1186/1939-8433-6-4.
- 1144 144. Waese J, Fan J, Pasha A, Yu H, Fucile G, Shi R, et al. ePlant: Visualizing and  
1145 Exploring Multiple Levels of Data for Hypothesis Generation in Plant Biology. *Plant Cell*.  
1146 2017;29: 1806-1821. DOI: <https://doi.org/10.1105/tpc.17.00073>.
- 1147 145. Korf I, Yandell M, Bedell J. BLAST: An Essential Guide to the Basic Local  
1148 Alignment Search Tool. O'Reilly. 2003;360. ISBN:0-596-00299-8.
- 1149 146. Hamilton N. ggtern: An extension to 'ggplot2', for the creation of ternary diagrams. R  
1150 package version 2.2.1 [software]. 2016. Available from: [https://CRAN.R-](https://CRAN.R-project.org/package=ggtern)  
1151 [project.org/package=ggtern](https://CRAN.R-project.org/package=ggtern).

1152  
1153

## 1154 **Supporting information**

1155 **S1 Fig. Homeolog expression patterns of expressed triads in hexaploid wheat.** Homeolog  
1156 expression pattern was calculated for 19,801 triads (59,403 genes) across 8 tissue types according to  
1157 published criteria [36], where triad defined as expressed when the sum of the A, B, and D subgenome  
1158 homoeologs was > 0.5 TPM. **(A)** Proportion of triads in each homoeolog expression pattern across the  
1159 8 tissues. *n* is number of expressed triads. **(B)** Ternary plot showing relative expression abundance of  
1160 14,837 expressed triads (44,511 genes) in the meiotic anther tissue. Each circle represents a gene triad  
1161 with an A, B, and D coordinate consisting of the relative contribution of each homeolog to the overall  
1162 triad expression. Triads in vertices correspond to single-subgenome–dominant categories, whereas  
1163 triads close to edges and between vertices correspond to suppressed categories. Box plots indicate the  
1164 relative contribution of each subgenome based on triad assignment to the seven categories.  
1165 Percentages between brackets indicate the percentage of triad number in each category to the total  
1166 number of triads.

1167 **S2 Fig. Proportion of genes in each homeologs number category.** Expressed genes across 8 tissues  
1168 were assigned to four categories (triads, duplets, monads and others).  $n$  indicates number of expressed  
1169 genes.

1170 **S3 Fig. Module-tissue relationship.** Each row corresponds to a module; each column corresponds to  
1171 a tissue type; Each cell contains the correlation value ( $r$ ) and, in brackets, its corresponding FDR  
1172 adjusted  $P$  value.  $n$  indicates number of samples. Only modules that have correlation value  $> 0.5$  are  
1173 shown.

1174 **S4 Fig. Enriched GO terms in the meiosis-related and other tissue-related modules.** Top 5 GO  
1175 terms are shown for each module. Black bars indicate the number of genes in the GO term.

1176 **S1 Table. Assignment of hexaploid wheat HC genes to four groups based on their copy number.**  
1177  $n$  is number of samples per tissue type.

1178 **S2 Table. The 130 RNA-Seq samples included in the co-expression analysis.** The samples belong  
1179 to eight different types of tissues (Intermed.tissue).

1180 **S3 Table. Number of genes and gene IDs in the modules identified using WGCNA.**

1181 **S4 Table. Enriched GO terms in all modules including the three meiosis-related modules.**

1182 **S5 Table. Gene IDs of wheat orthologs of known meiotic genes in other plants species.**

1183 **S6 Table. Meiotic genes and their orthologs in wheat according to EnsemblPlants prediction.**

1184 **S7 Table. List of wheat genes with meiotic GO term(s)**

1185 **S8 Table. Fishers exact test and FDR adjusted p-value for "Orthologs" and "Meiotic GO"  
1186 genes enrichment in modules.**

1187 **S9 Table. Assignment of wheat orthologs of known meiotic genes to the meiosis-related modules.**

1188 **S10 Table. Expression pattern of wheat orthologs of meiotic genes that were not assigned to the  
1189 meiosis-related modules.** Average expression values (TPMs) is shown for the 8 tissue types.

1190 **S11 Table. Copy number of orthologs of meiotic gene in wheat and its ancestors.** MR indicates  
1191 wheat orthologs of known meiotic recombination genes. ZMM indicates orthologs of ZMM pathway  
1192 genes.

1193 **S12 Table. Assignment of the genes in triads to the co-expression network modules.** Genes  
1194 belong to Meiotic, Non-meiotic, Leaves, Grain and Roots modules and "Orthologs & Meiotic GO"  
1195 gene sets are indicated in the table. Balance as a gene category refer to the genes belong to balanced  
1196 triads.

1197 **S13 Table. HC genes distribution across wheat genomic compartment.**

1198 **S14 Table. List of the core histone and histone modification genes identified in the wheat**  
1199 **genome.** All wheat genes annotated as core histones (Fun.annotation) or having GO terms related to  
1200 histone modification (GO) were selected.

1201 **S15 Table. List of transcription factors in the meiosis-related modules 2, 28 and 4.**

1202 **S16 Table. Fishers exact test for TF families enrichment in modules.**

1203 **S17 Table. Literature review of the functionally characterized meiotic genes in model plant**  
1204 **species.**

1205 **S18 Table. Defining the expressed triads in meiotic anther tissue.** Triad is considered as expressed  
1206 when one of its homeologs is expressed according to the criterion used in our WGCNA analysis.

1207 **S19 Table. Gene category assignment based on the sub-genome of origin and triad description.**

1208 **S1 Text. R script used to summarize expression values (counts) from transcript to gene level.**

1209 **S2 Text. R script used to combine samples from all studies and normalize counts for WGCNA**  
1210 **analysis.**

1211 **S3 Text. R script used to calculate the soft power threshold for the WGCNA analysis.**

1212 **S4. Text. R script used to run the WGCNA analysis and MEs calculation and plotting.**



- 1213 **S5. Text. R scripts used to calculate module-tissue correlation.**
- 1214 **S6. Text. R scripts used for enrichment analysis of GO and GO slim terms in the modules.**
- 1215 **S7. Text. R scripts used for enrichment analysis of “Orthologs” and “Meiotic GO” genes in the**  
1216 **modules.**
- 1217 **S8 Text: R script used to calculate hub genes for each module.** Top 10 hub genes were selected for  
1218 each module.
- 1219 **S9. Text. R script used for the assessment of TF families in modules.**
- 1220 **S10 Text. R script used to calculate homeolog expression patterns in triads.**
- 1221 **S11. Text. R script used to export meiosis-related modules data for visualisation.**

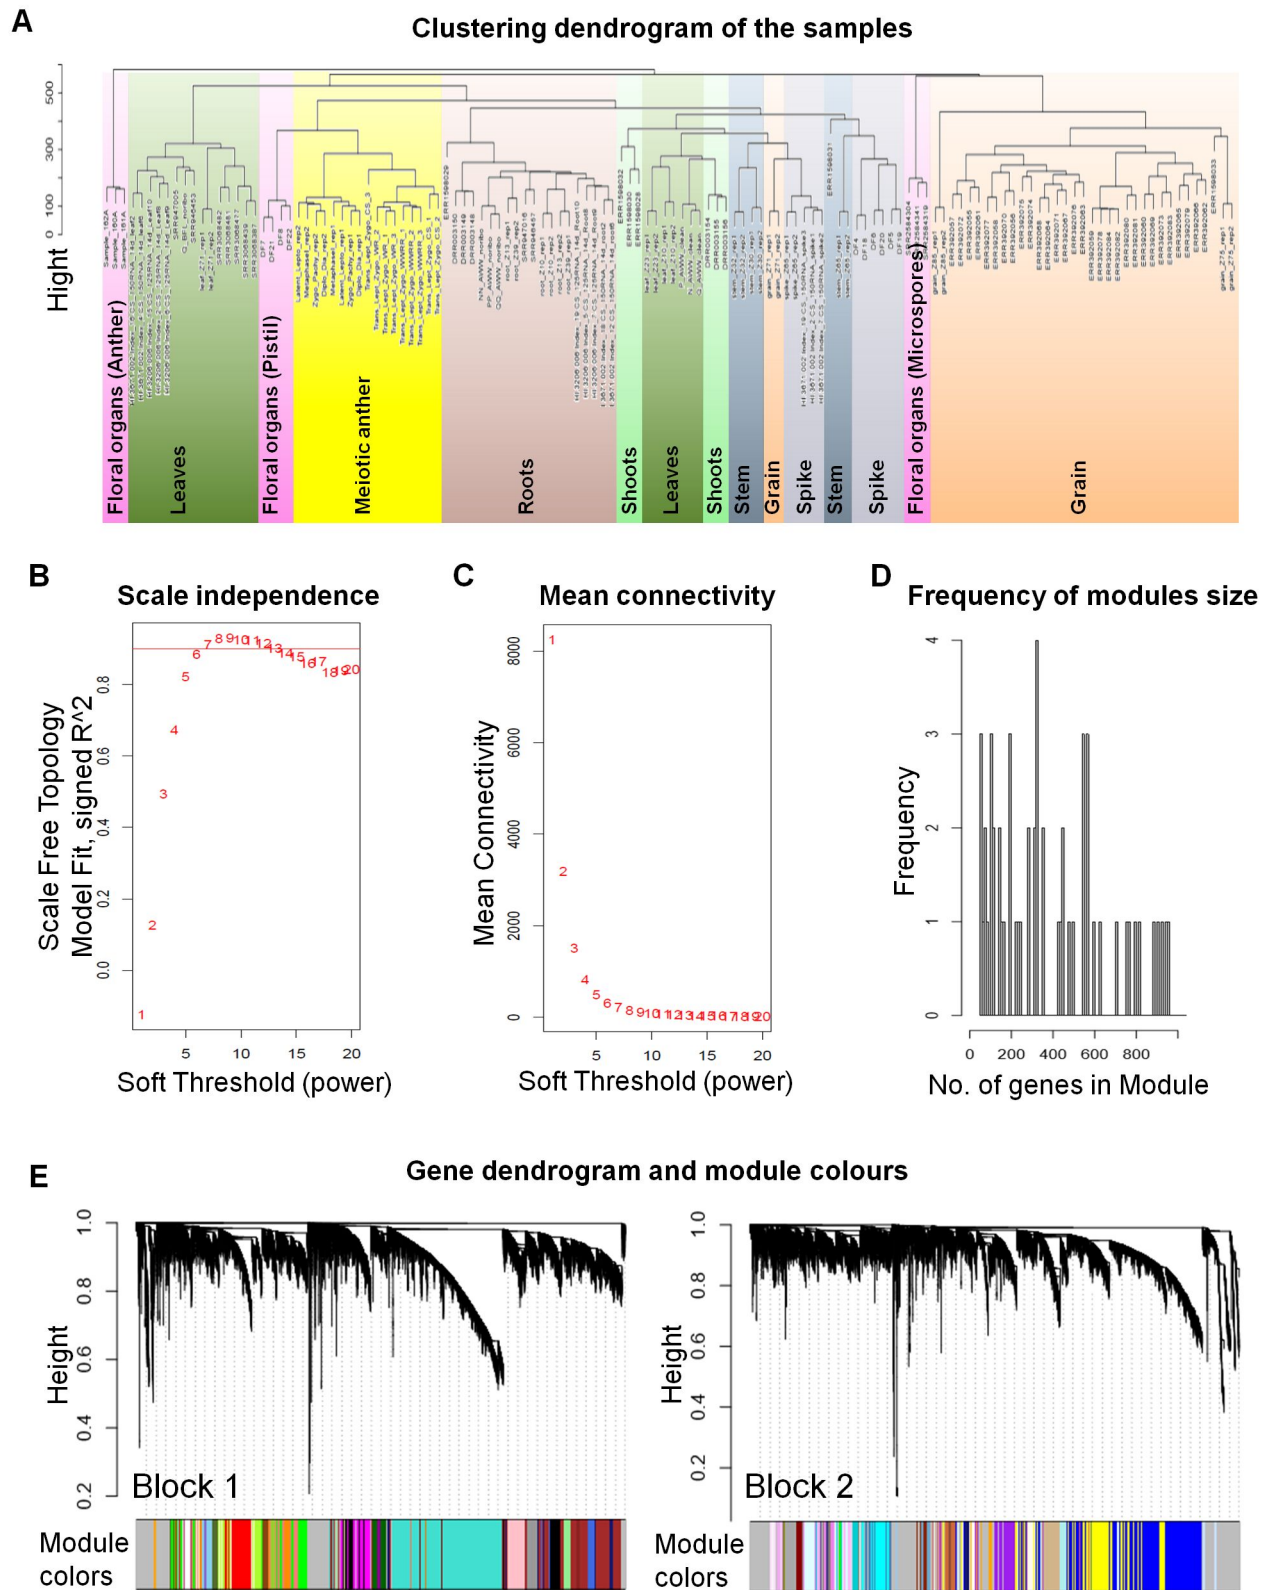

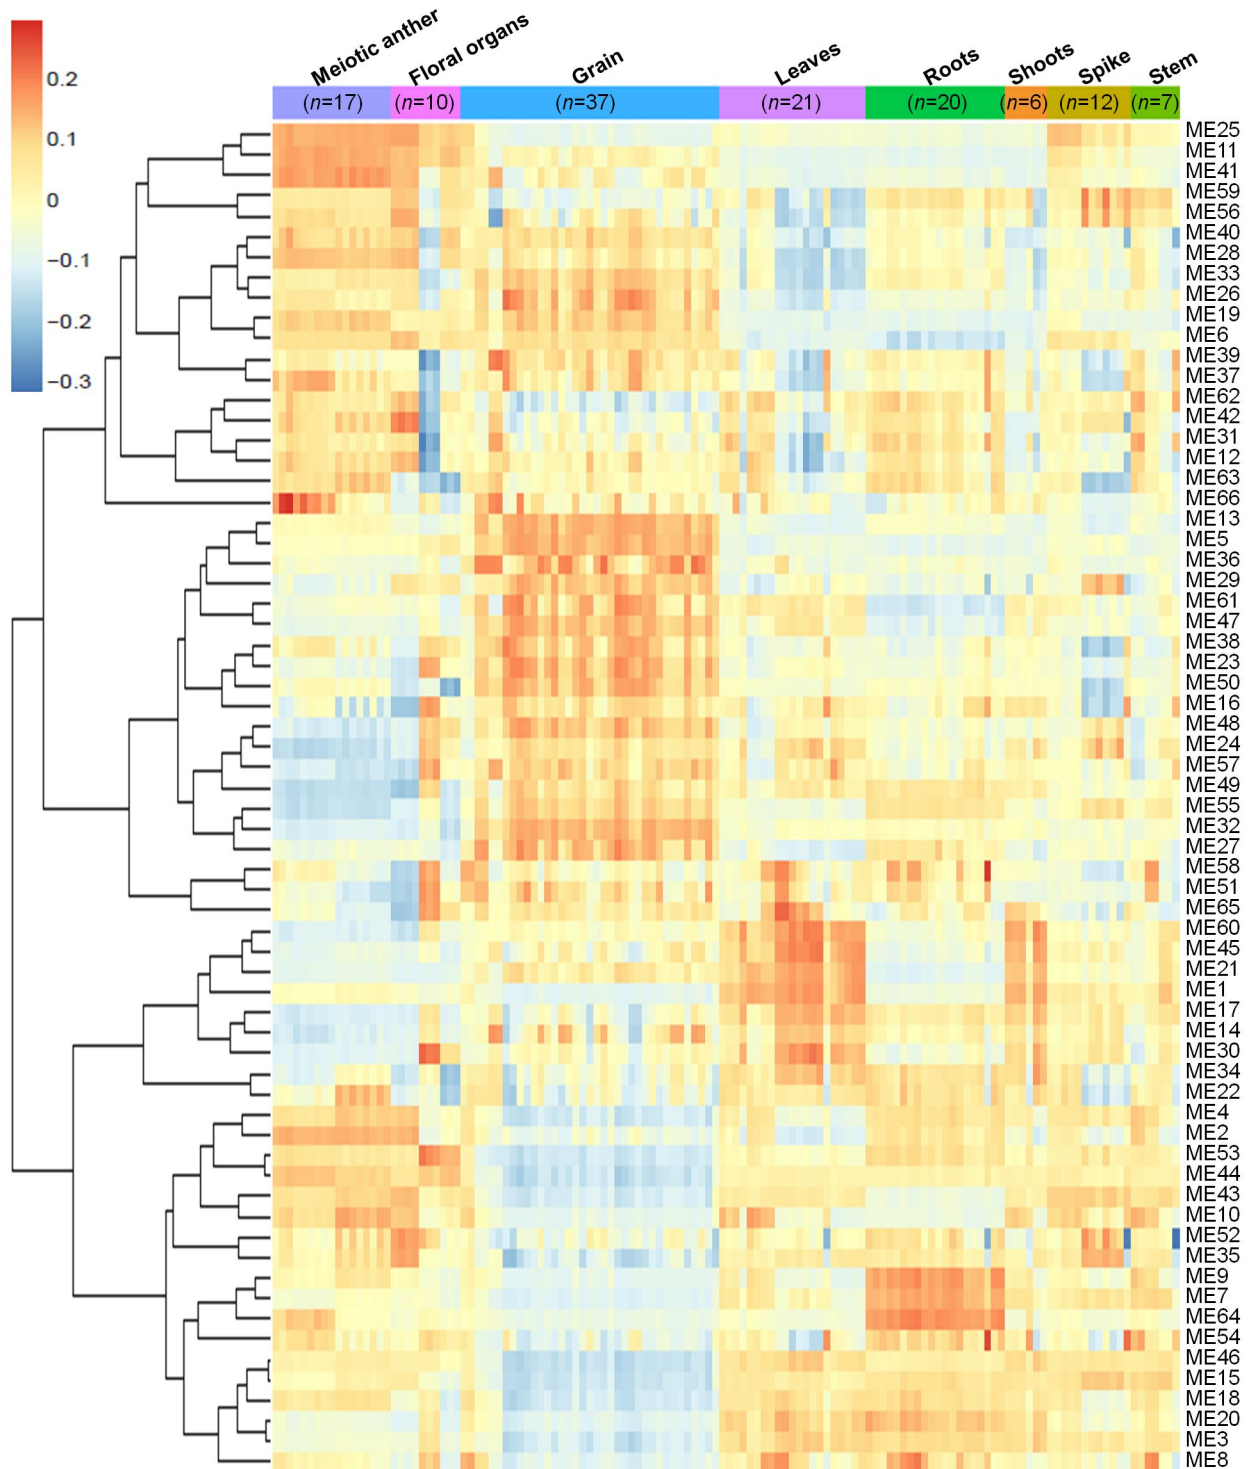

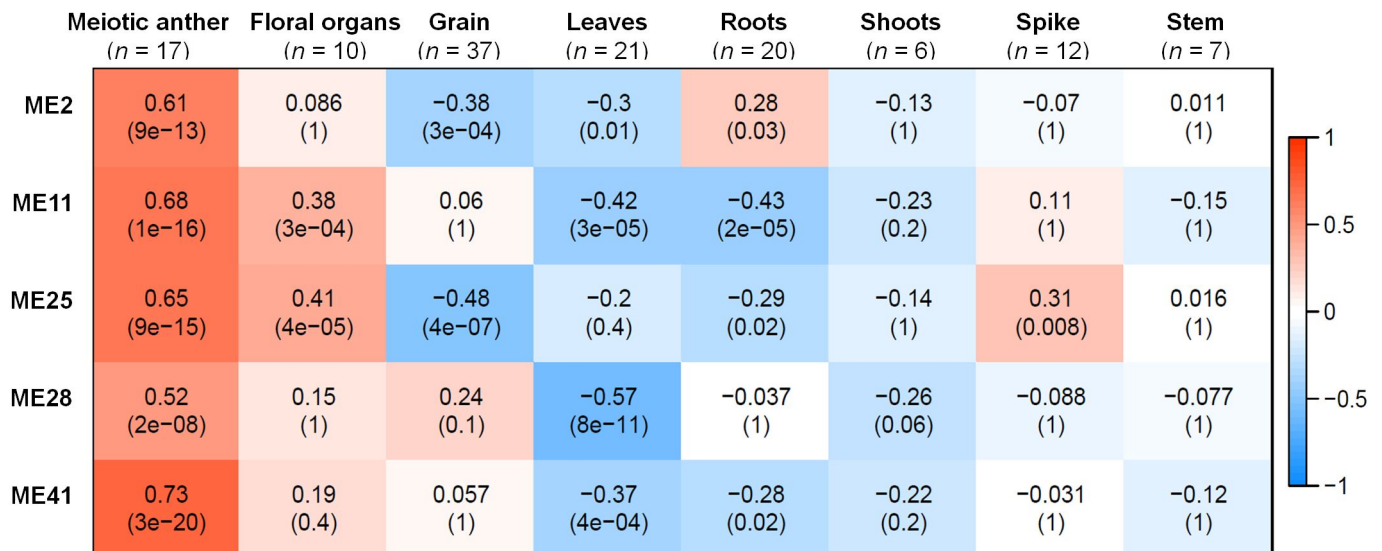

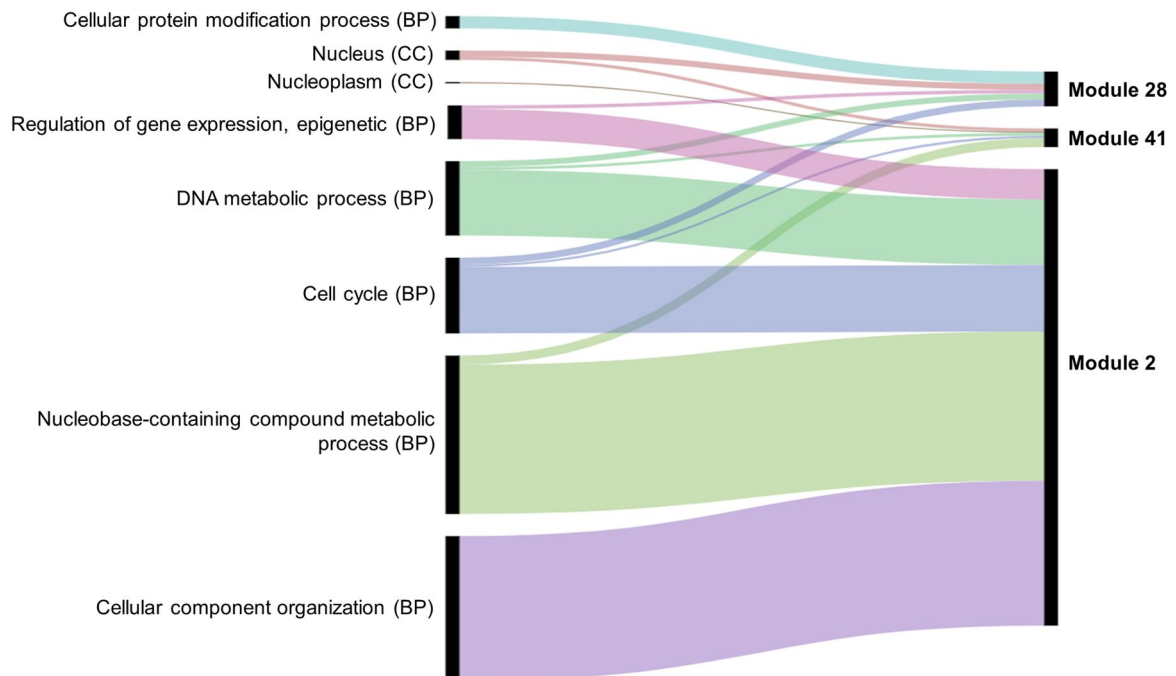

A

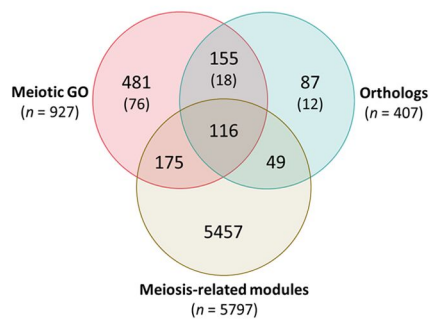

B

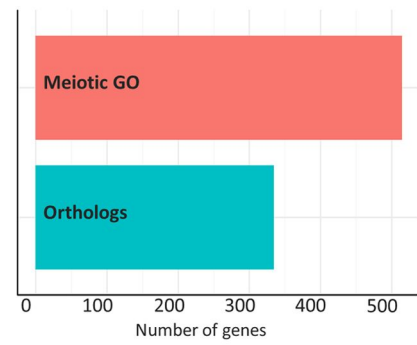

C

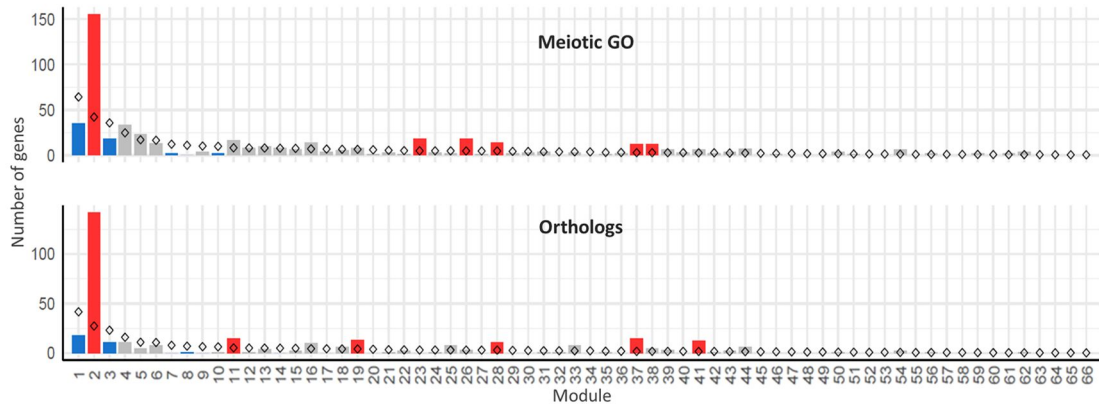

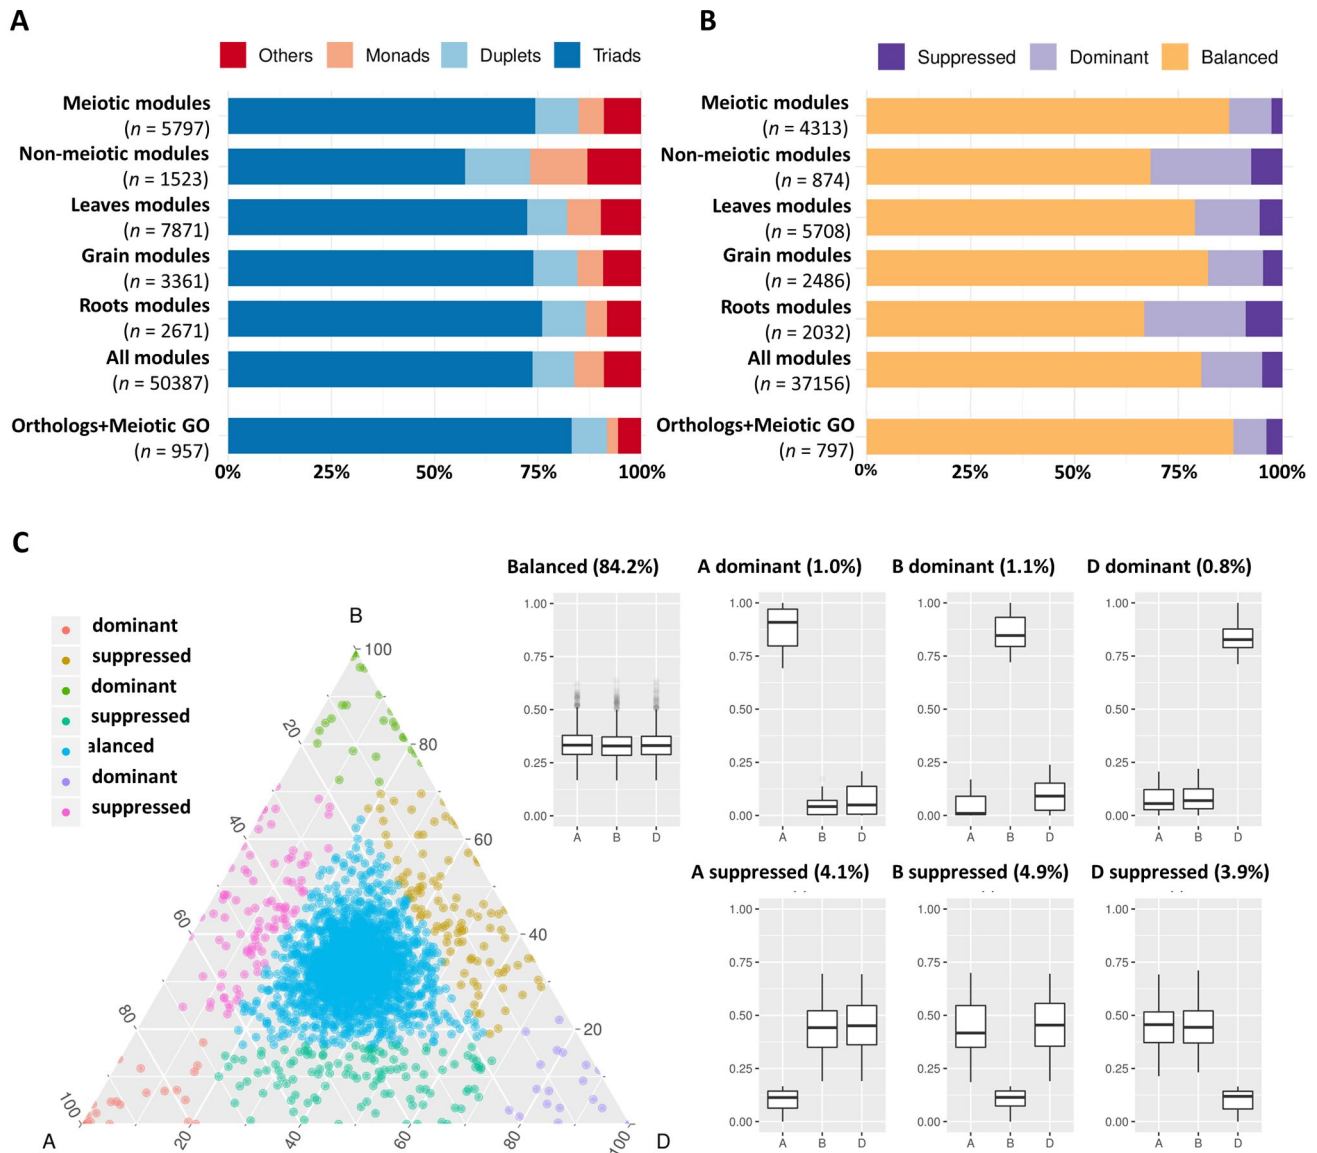

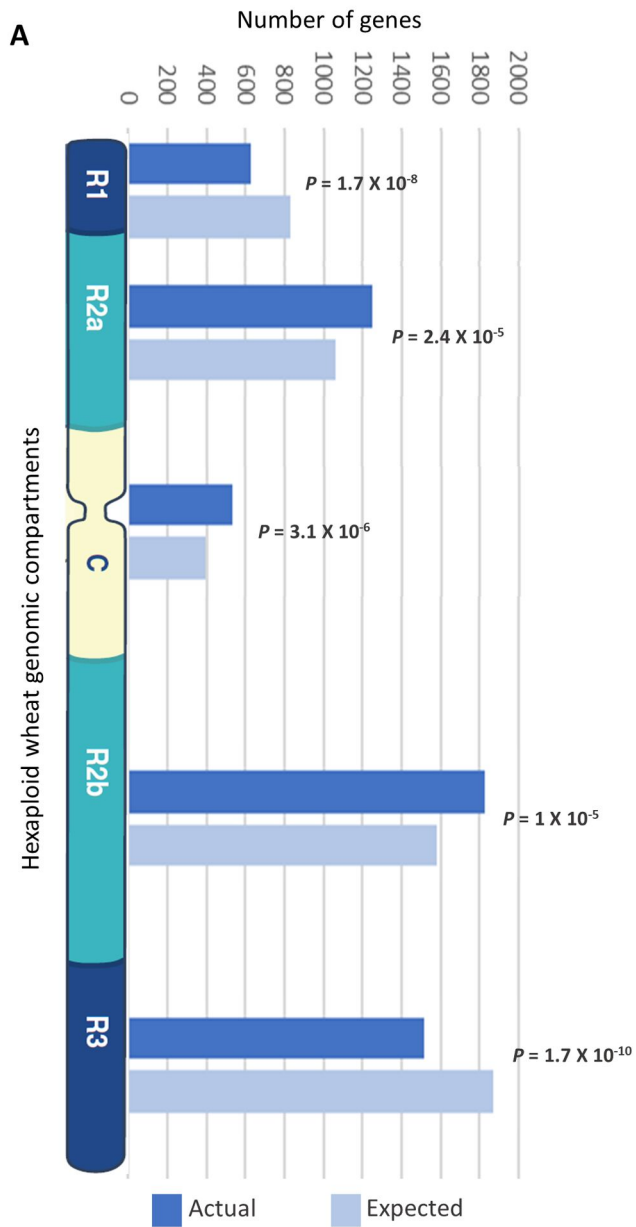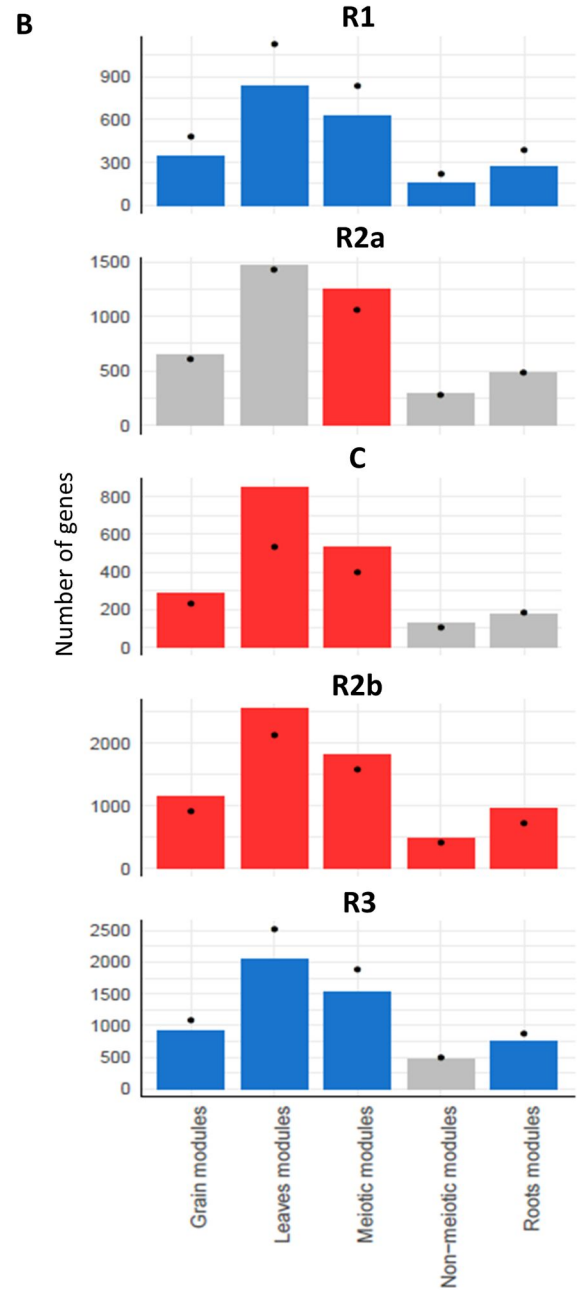



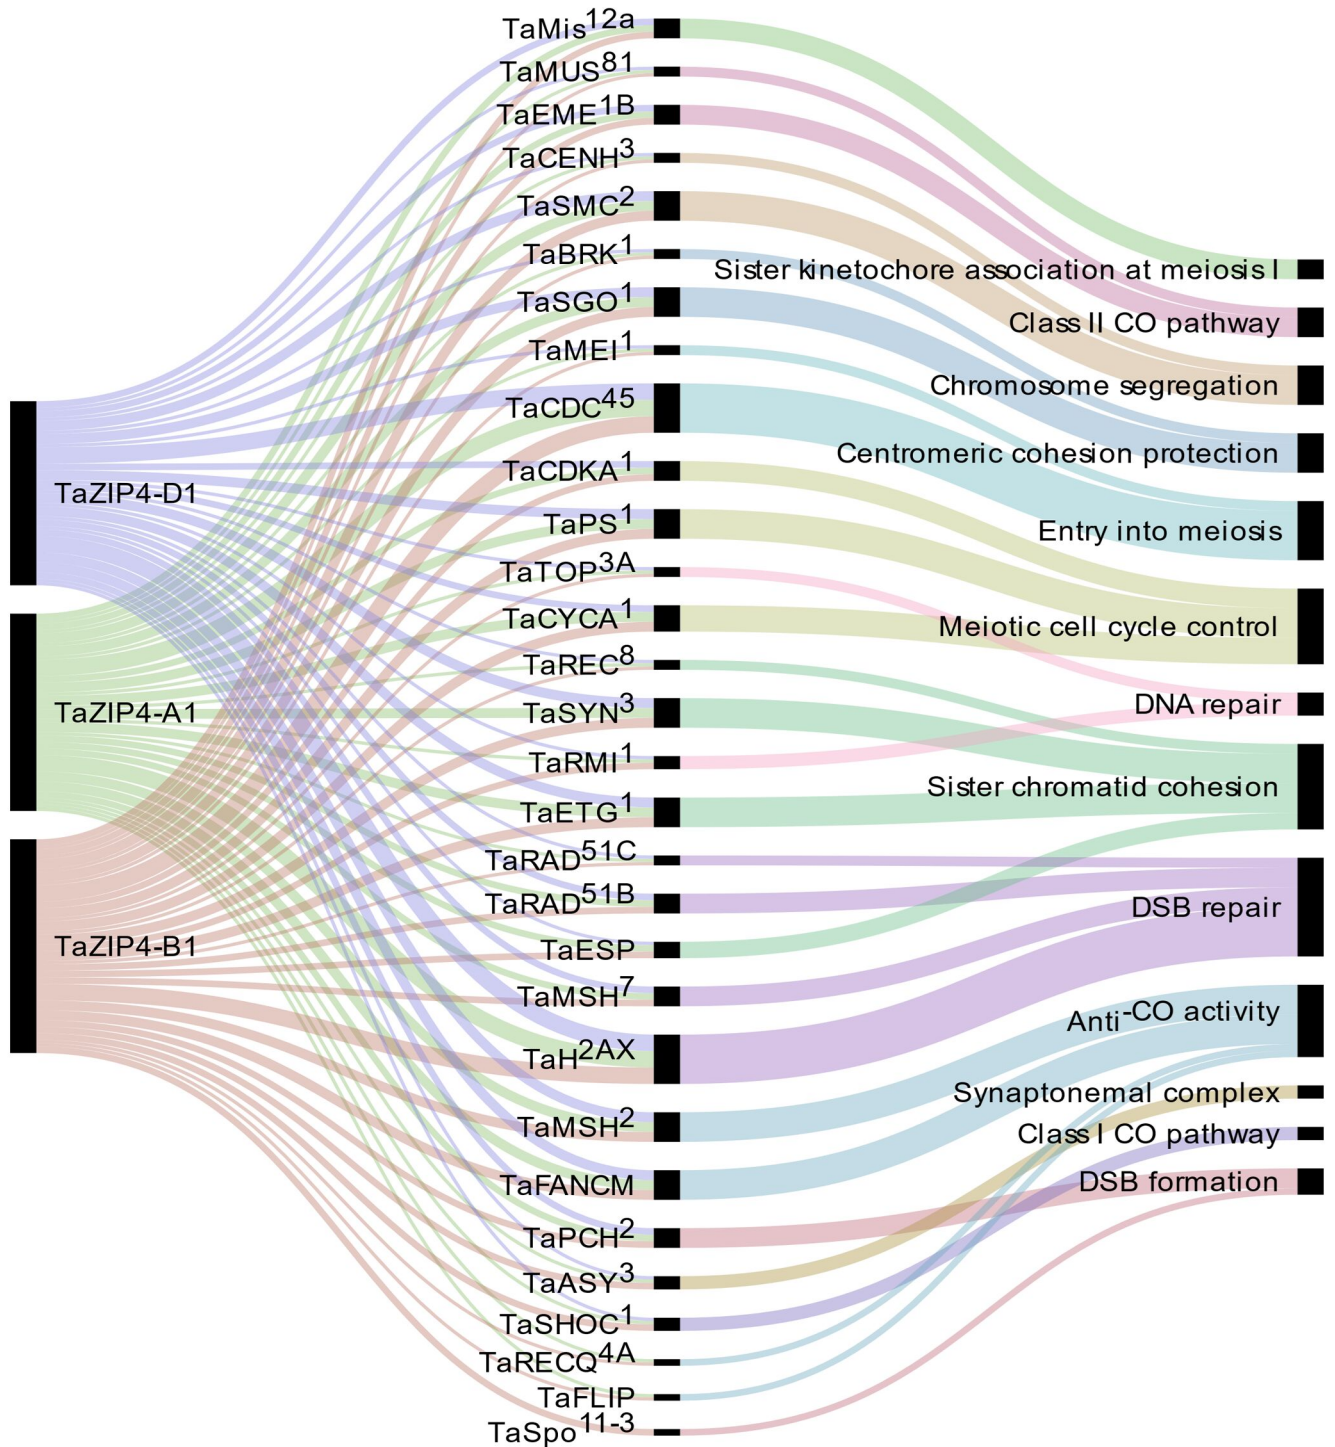

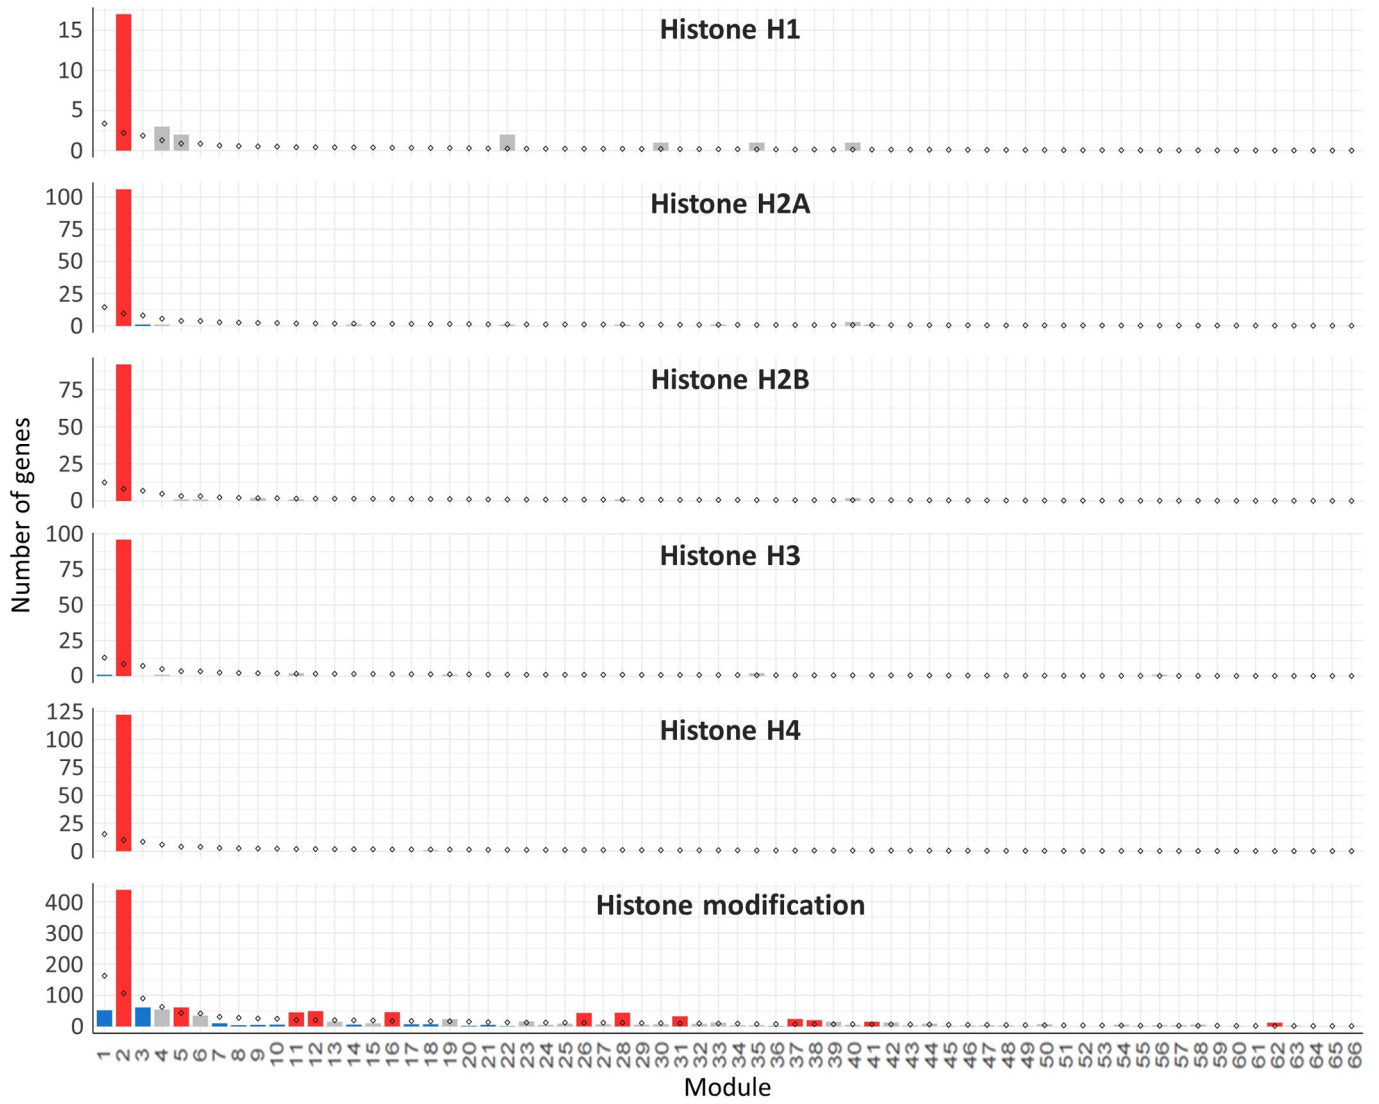

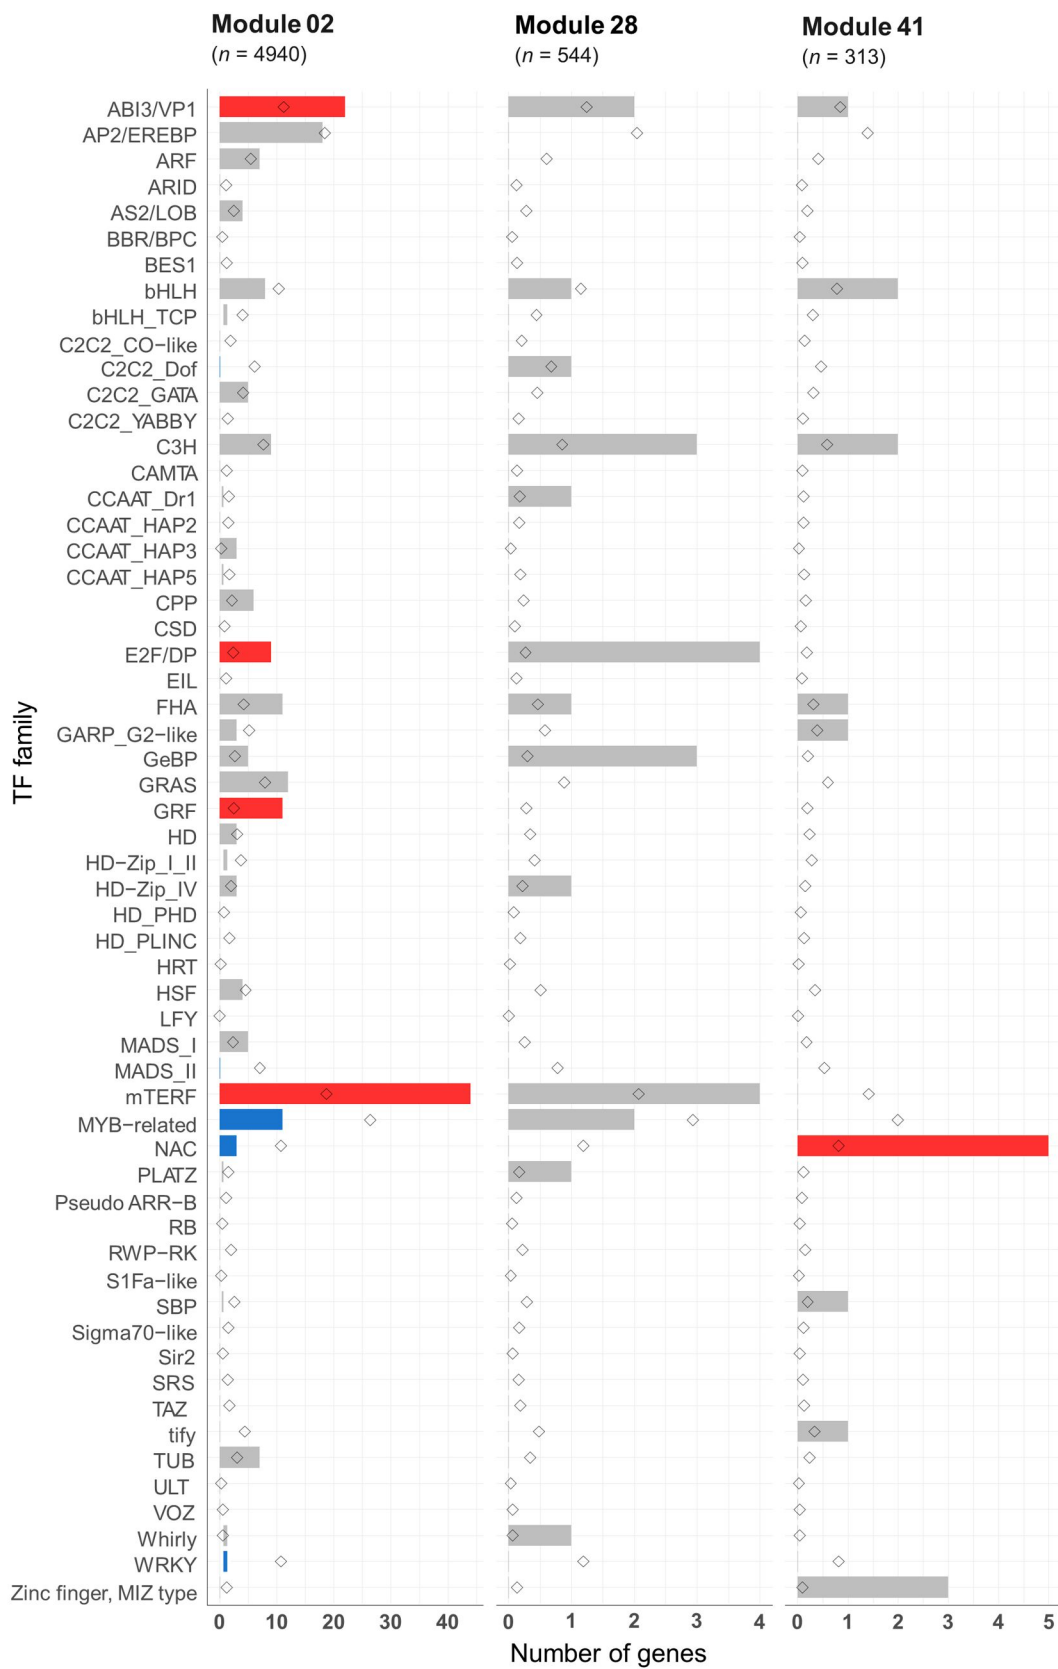

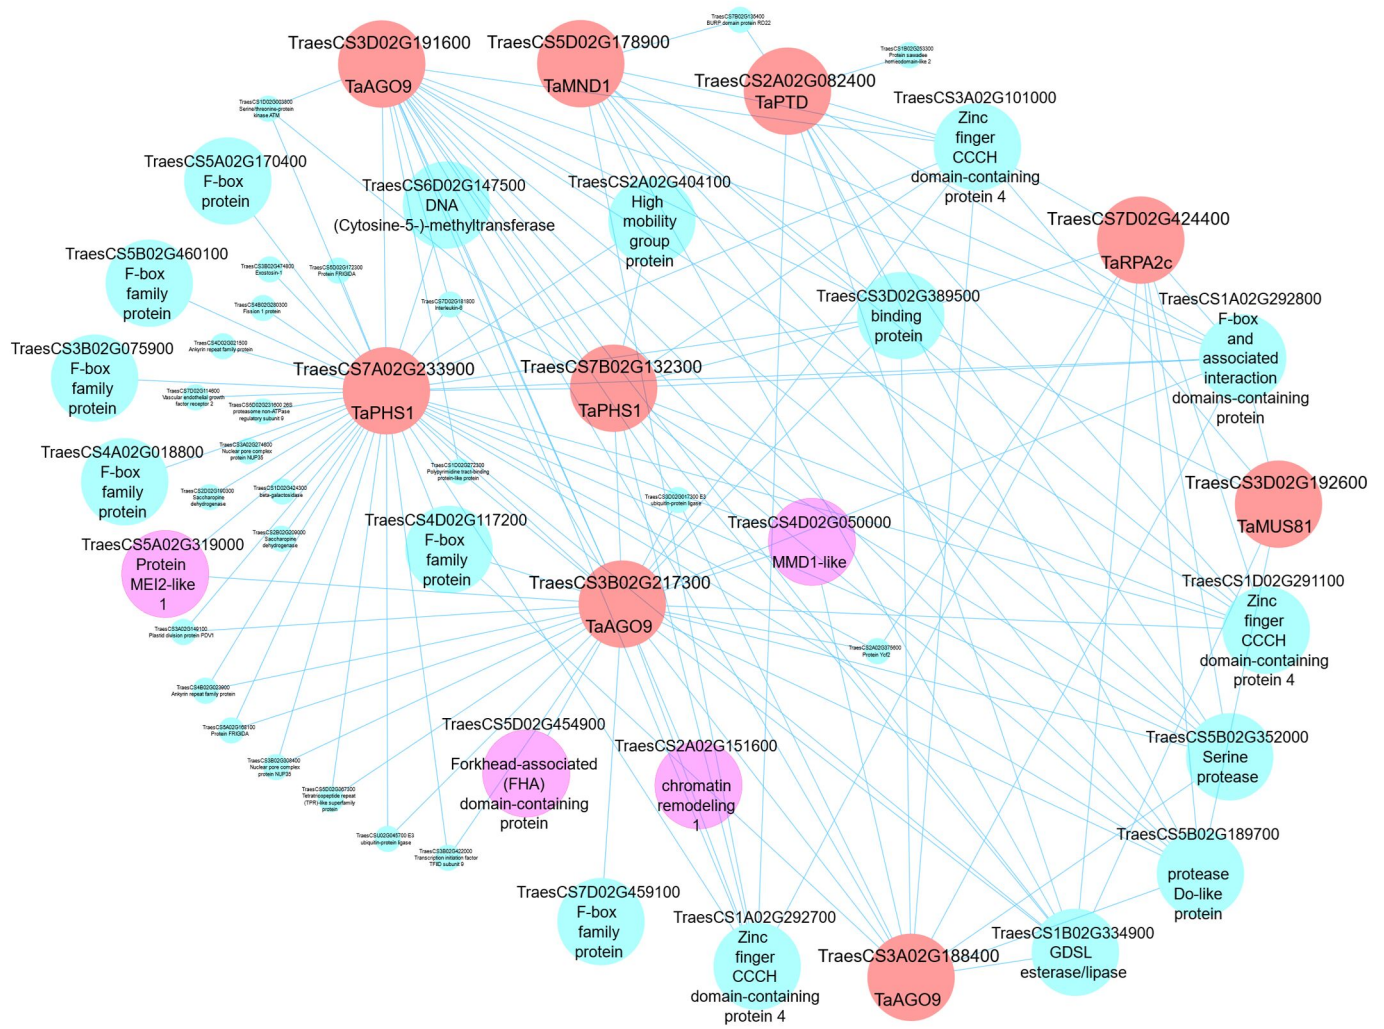

Source: https://www.biorxiv.org/content/biorxiv/early/2019/07/08/695759.full.pdf
